# Supplementary material
Source: PubMed Central journal article supplement (PMC6171267)
Supplement: ASN.2018020192SupplementaryData1.pdf [file ASN.2018020192SupplementaryData1.pdf]

## Table of Contents

|                                                                                                           |    |
|-----------------------------------------------------------------------------------------------------------|----|
| Table 1. Genotyping, quality control, imputation, and analysis methods in the participating studies ..... | 2  |
| Figure 1. QQ-Plot.....                                                                                    | 3  |
| Figure 2a. Regional Association Plot, rs17216707.....                                                     | 4  |
| Figure 2b. Regional Association Plot, rs2769071.....                                                      | 5  |
| Figure 2c. Regional Association Plot, rs11741640.....                                                     | 6  |
| Figure 2d. Regional Association Plot, rs17479566.....                                                     | 7  |
| Figure 2e. Regional Association Plot, rs9925837.....                                                      | 8  |
| Figure 3. Manhattan Plot, Model 2, European Ancestry .....                                                | 9  |
| Figure 4a. Forest plot of beta-coefficients for rs17216707 from individual studies (Model 1) .....        | 10 |
| Figure 4b. Forest plot of beta-coefficients for rs2769071 from individual studies (Model 1) .....         | 10 |
| Figure 4c. Forest plot of beta-coefficients for rs11741640 from individual studies (Model 1) .....        | 11 |
| Figure 4d. Forest plot of beta-coefficients for rs17479566 from individual studies (Model 1) .....        | 11 |
| Figure 4e. Forest plot of beta-coefficients for rs9925837 from individual studies (Model 1) .....         | 12 |
| Supplementary Table 2. Annotated SNPs demonstrating suggestive significance.....                          | 13 |
| Supplementary Table 3. Associations of top SNPs with ln-transformed intact FGF23 concentration..          | 25 |
| Supplementary Table 4. Genetically predicted gene expression results .....                                | 26 |

**Table 1. Genotyping, quality control, imputation, and analysis methods in the participating studies**

| Study                | Genotyping Platform/Chip                                                                                                       | SNP Inclusion Criteria |             |                | Genomic control parameter |
|----------------------|--------------------------------------------------------------------------------------------------------------------------------|------------------------|-------------|----------------|---------------------------|
|                      |                                                                                                                                | SNP Call rate          | MAF         | HWE p-value    |                           |
| ARIC                 | Affymetrix 6.0                                                                                                                 | $\geq 0.95$            | $\geq 0.01$ | $\geq 10^{-4}$ | 1.036                     |
| CHS                  | European ancestry: Illumina 370CNV BeadChip merged with IBC Illumina iSELECT<br>African ancestry: Illumina Human Omni1-Quad_v1 | $\geq 0.97$            | $\geq 0.01$ | $\geq 10^{-4}$ | 1.009                     |
| Indiana              | Illumina Quad 660 BeadChip                                                                                                     | $\geq 0.95$            | $\geq 0.03$ | $\geq 10^{-4}$ | 1.175                     |
| MESA                 | Affymetrix 6.0                                                                                                                 | $\geq 0.95$            | $\geq 0.01$ | $\geq 10^{-4}$ | 1.020                     |
| MrOS (GBG and Malmo) | Illumina Human Omni1-Quad_v1                                                                                                   | $\geq 0.98$            | $\geq 0.01$ | $\geq 10^{-4}$ | 1.023                     |
| OPRA                 | Affymetrix 6.0                                                                                                                 | $\geq 0.97$            | $\geq 0.01$ | $\geq 10^{-4}$ | 1.014                     |

\*CHS additionally excluded for heterozygote frequency=0,  $\geq 1$  duplicate error, or Mendelian inconsistency in HapMap controls.

All cohorts used EIGENSTRAT for principal components of ancestry computation.

**Figure 1. QQ-Plot (Genomic inflation factor  $\lambda=1.007$ )**

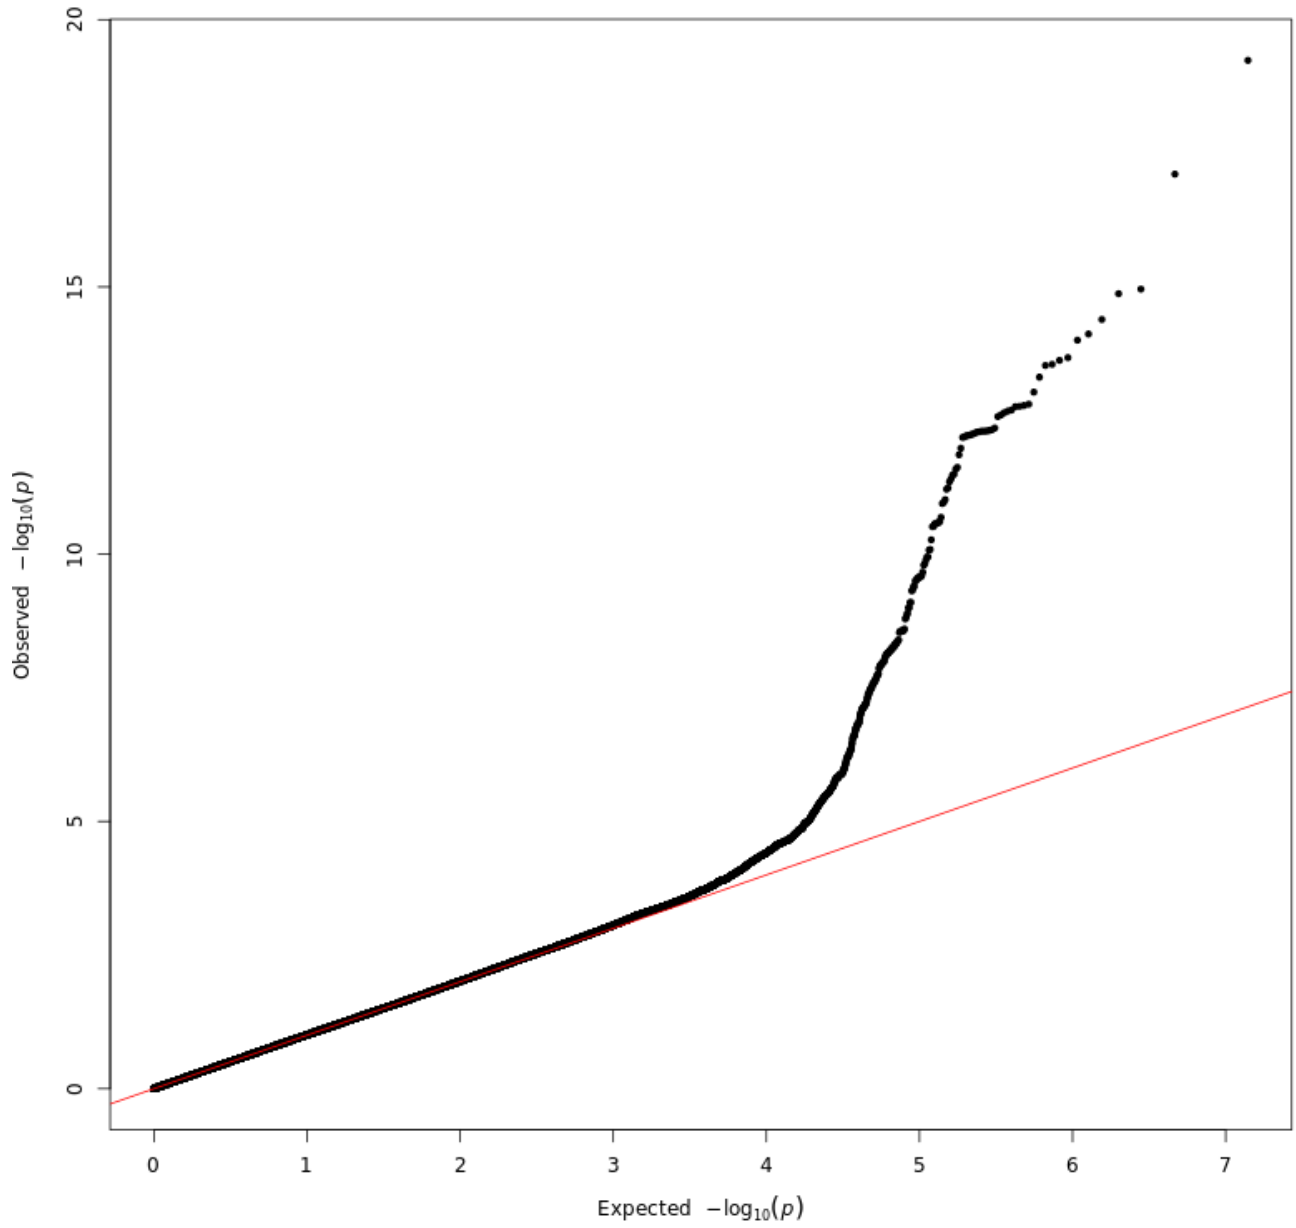

**Figure 2a. Regional Association Plot, rs17216707**

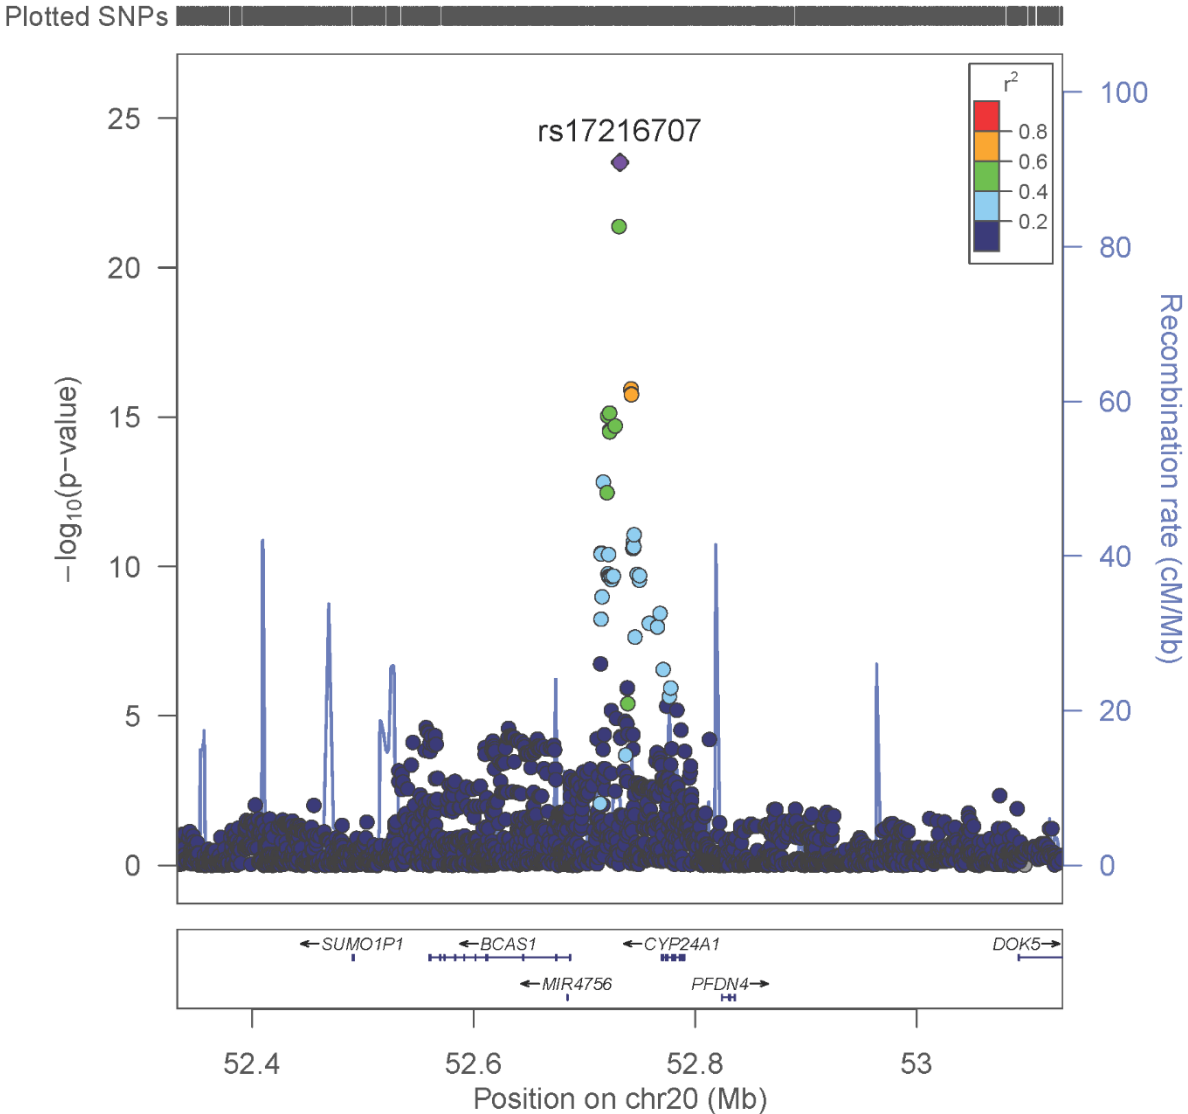

**Figure 2b. Regional Association Plot, rs2769071**

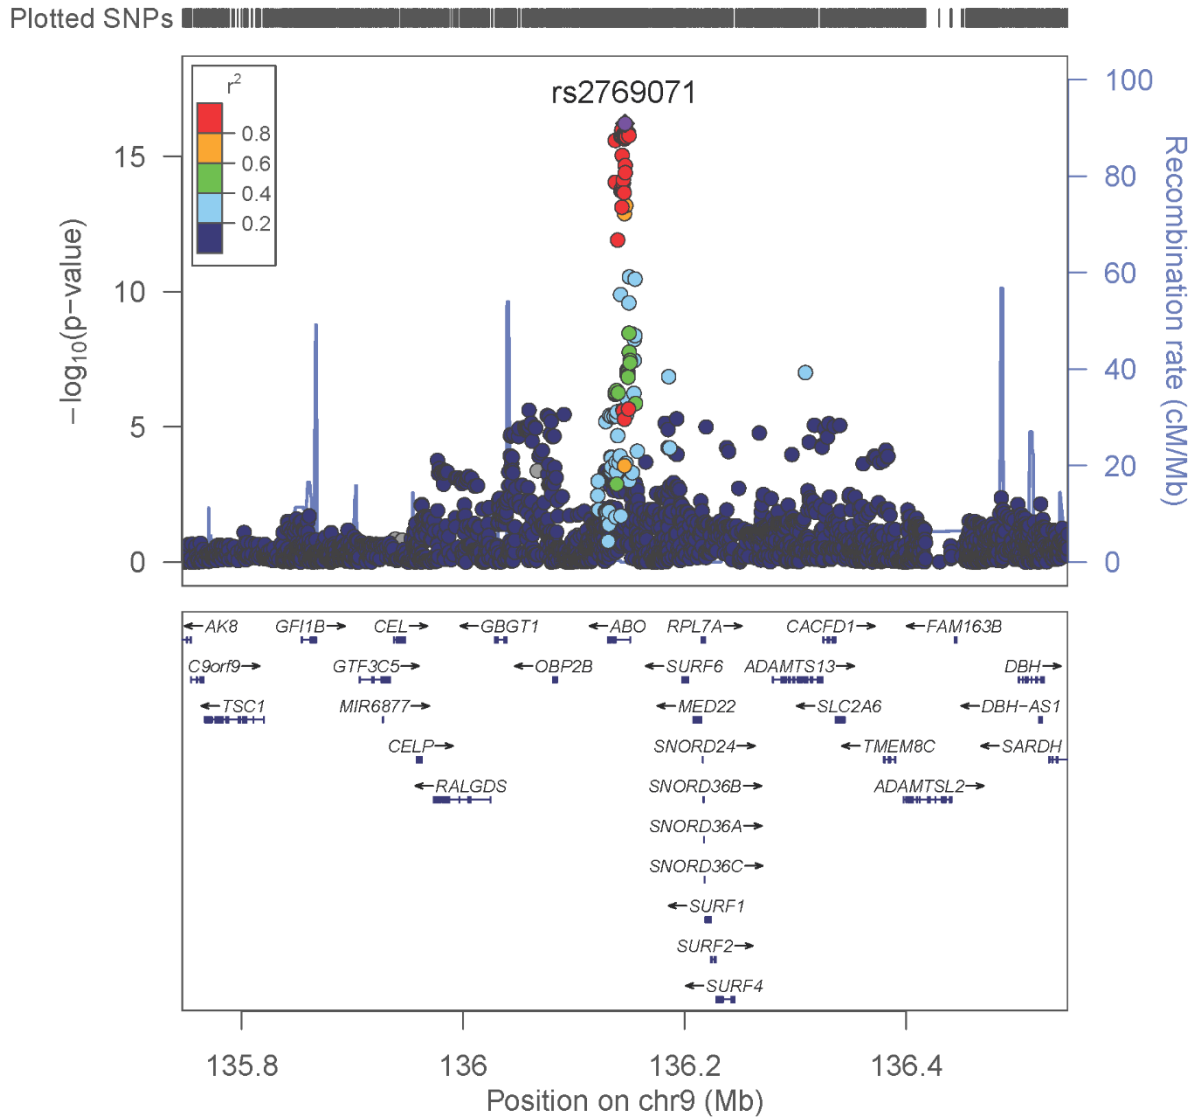

**Figure 2c. Regional Association Plot, rs11741640**

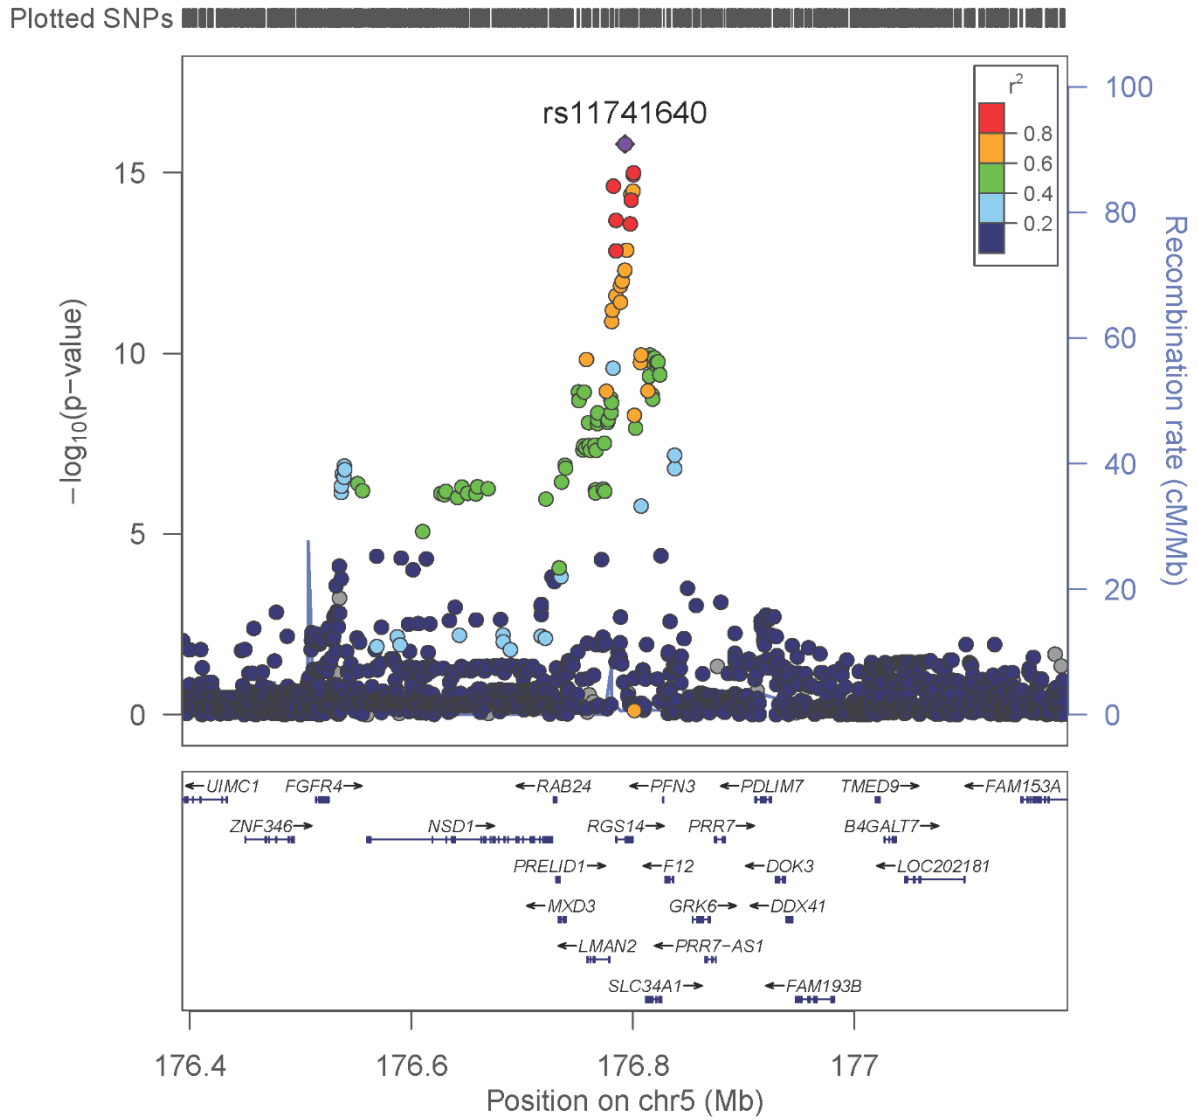

Figure 2d. Regional Association Plot, rs17479566

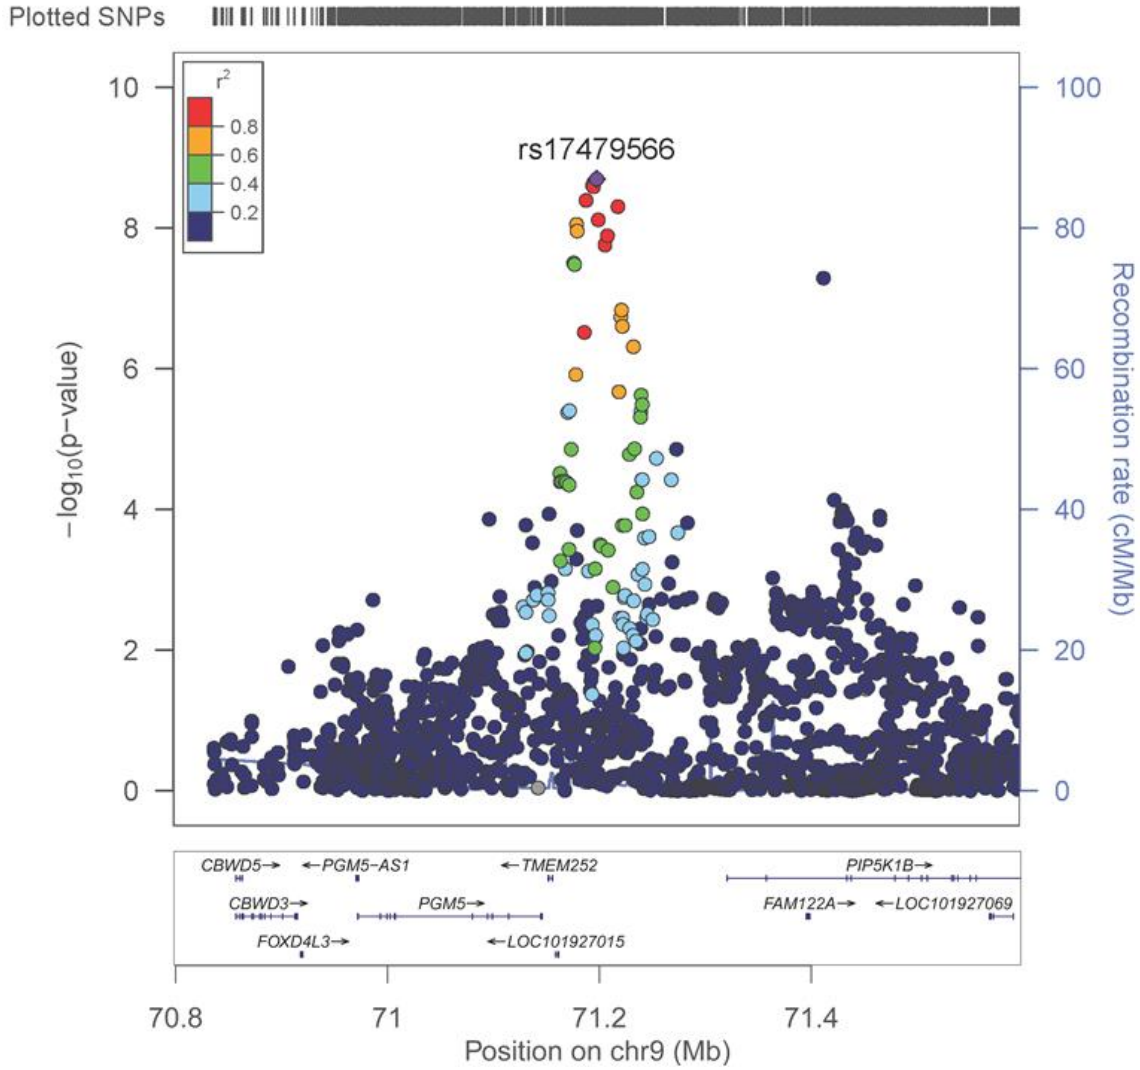

Figure 2e. Regional Association Plot, rs9925837

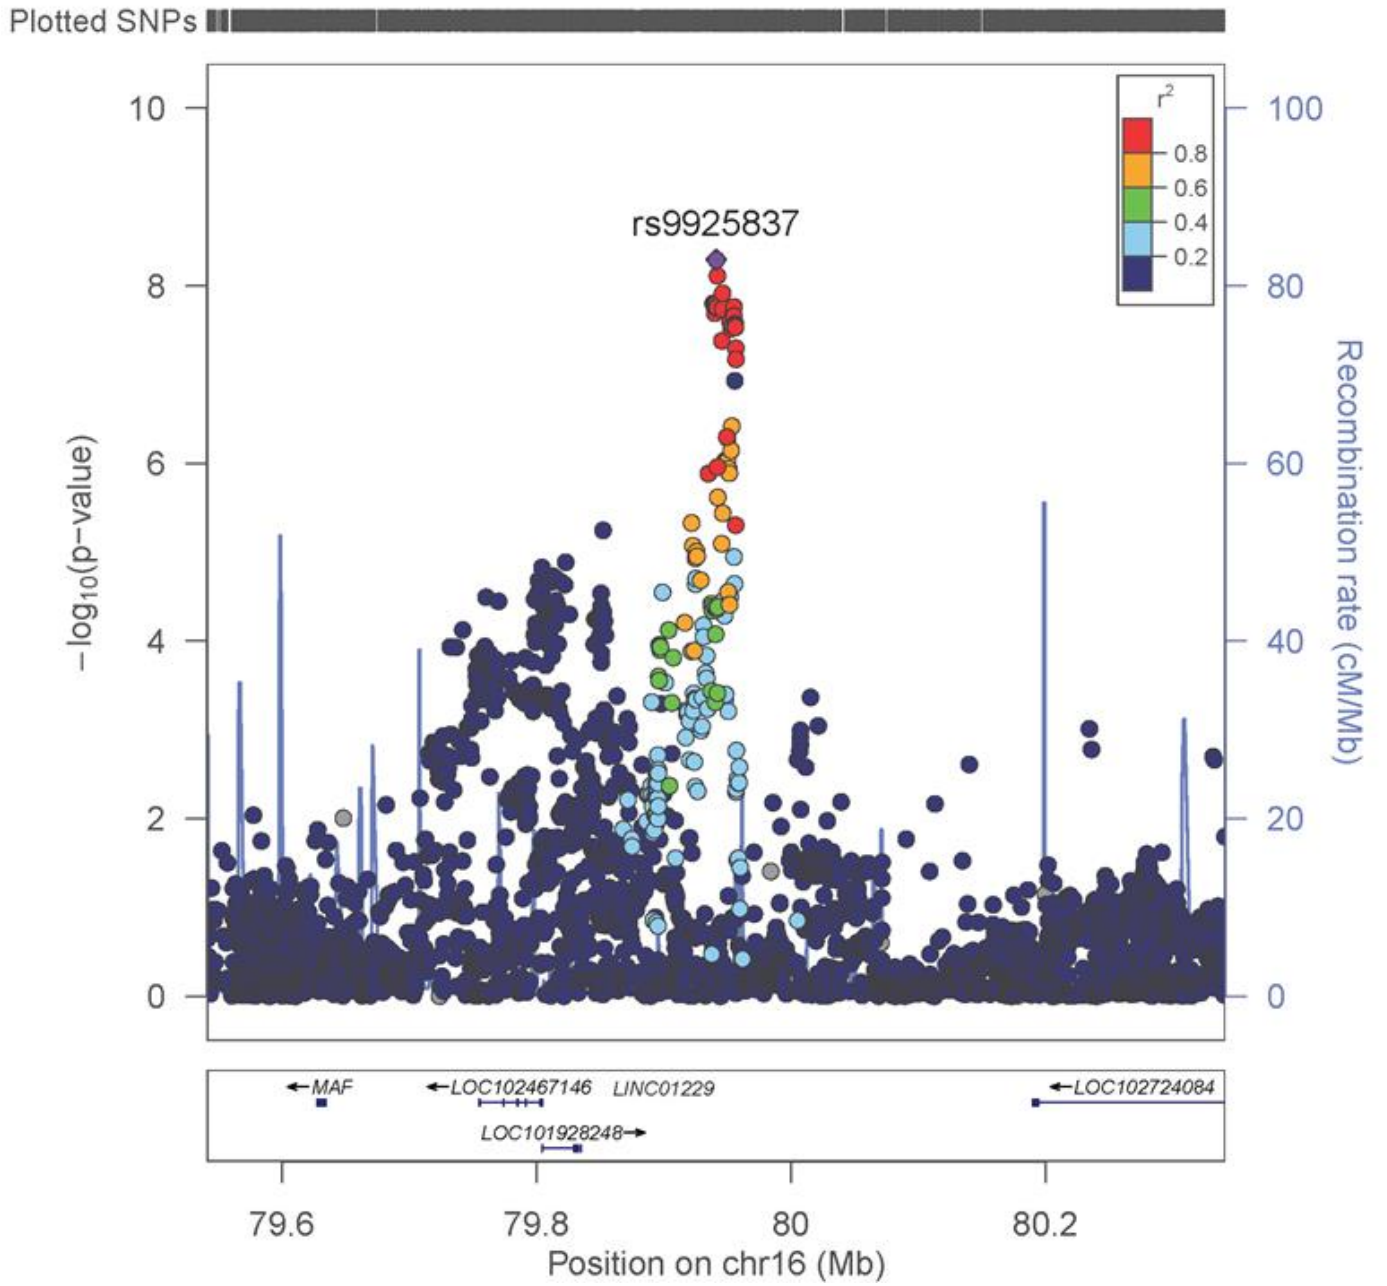



Figure 3. Manhattan Plot, Model 2, European Ancestry

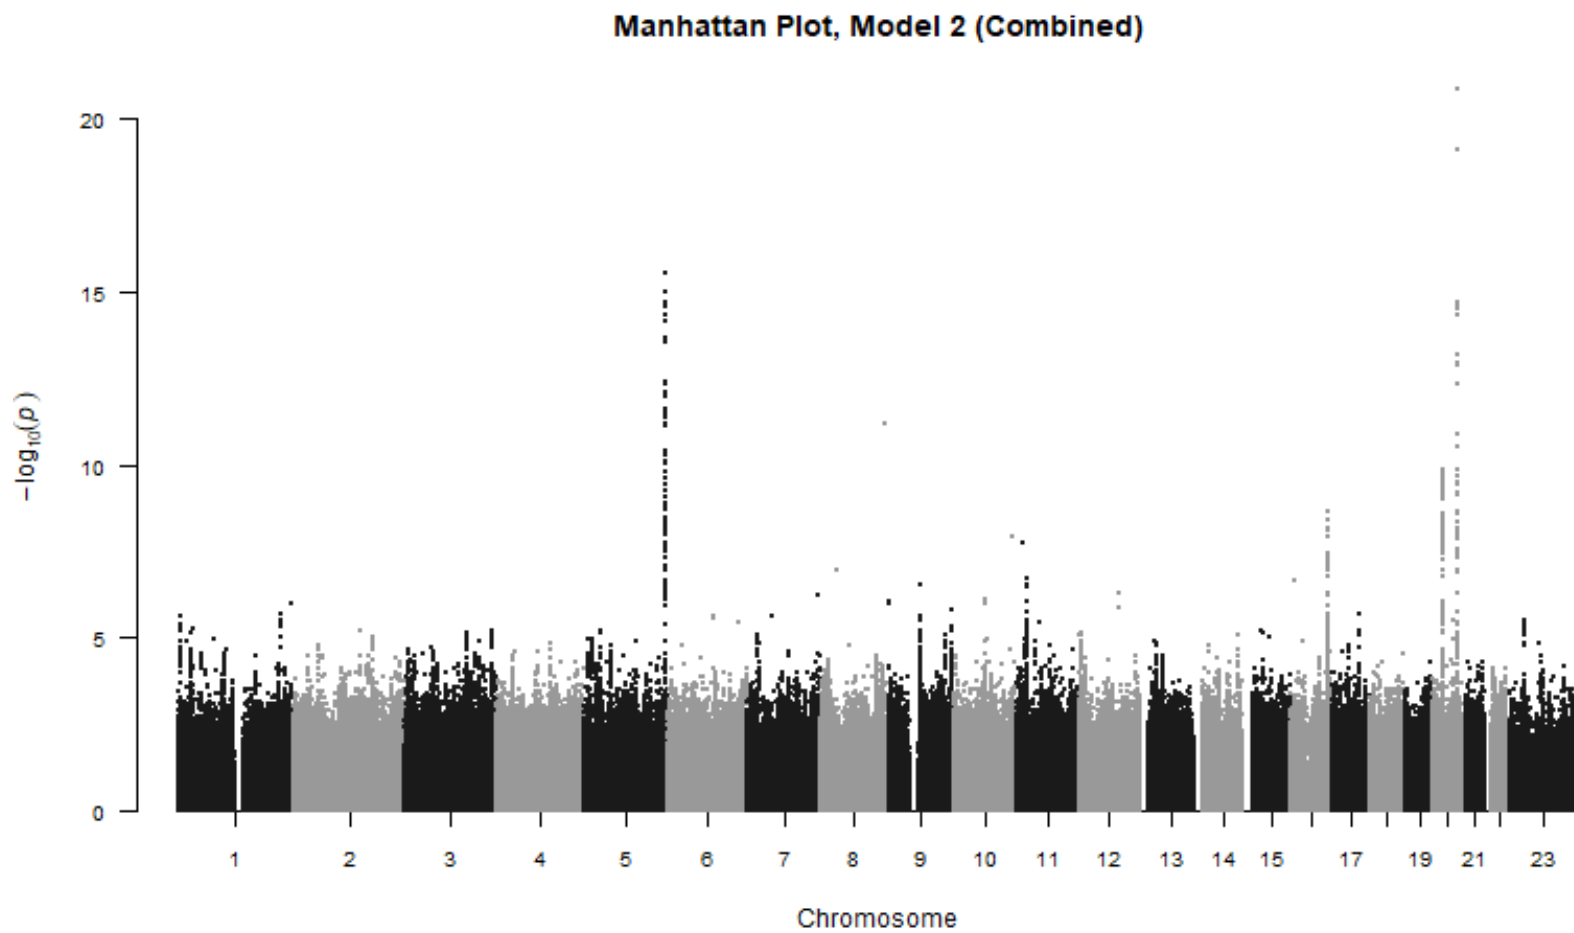

**Figure 4a. Forest plot of beta-coefficients for rs17216707 from individual studies (Model 1)**

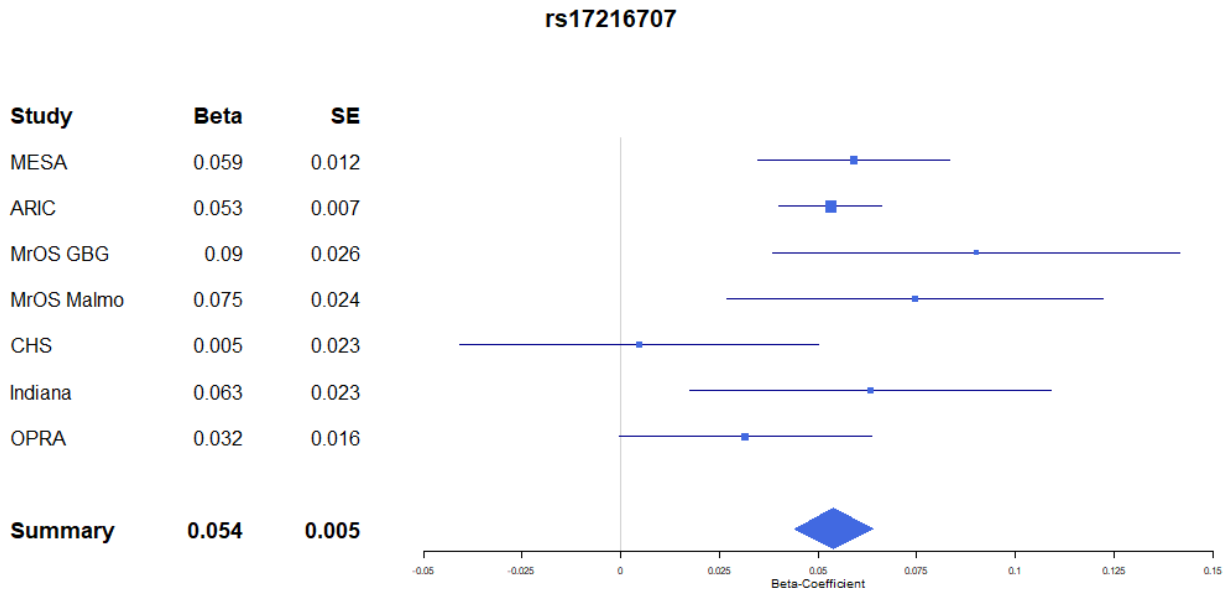

**Figure 4b. Forest plot of beta-coefficients for rs2769071 from individual studies (Model 1)**

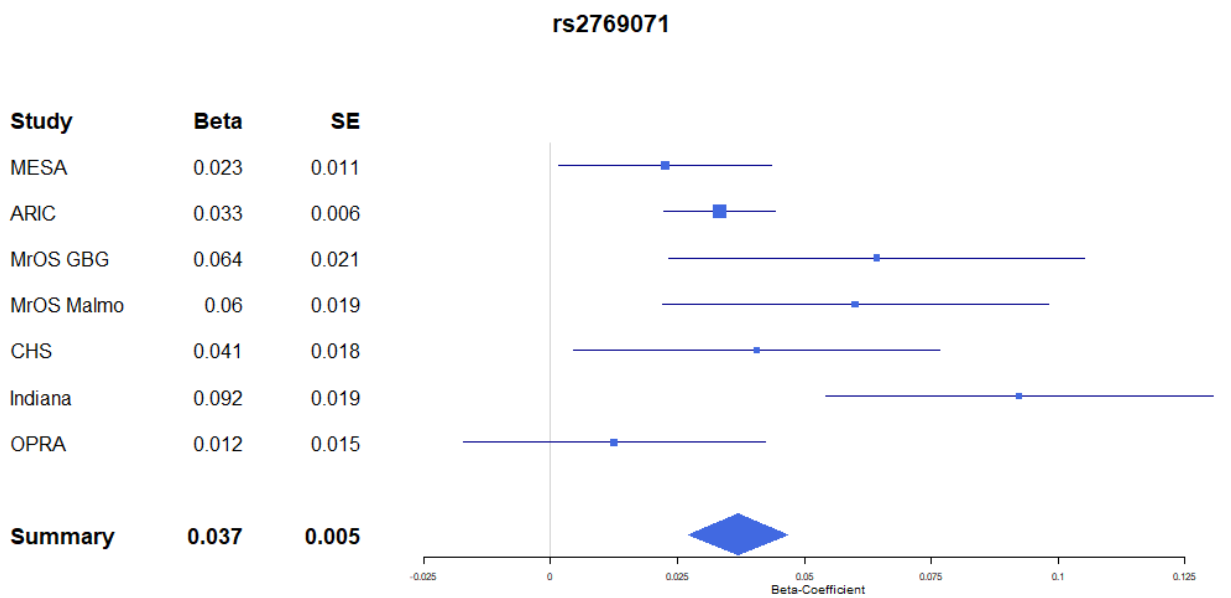

**Figure 4c. Forest plot of beta-coefficients for rs11741640 from individual studies (Model 1)**

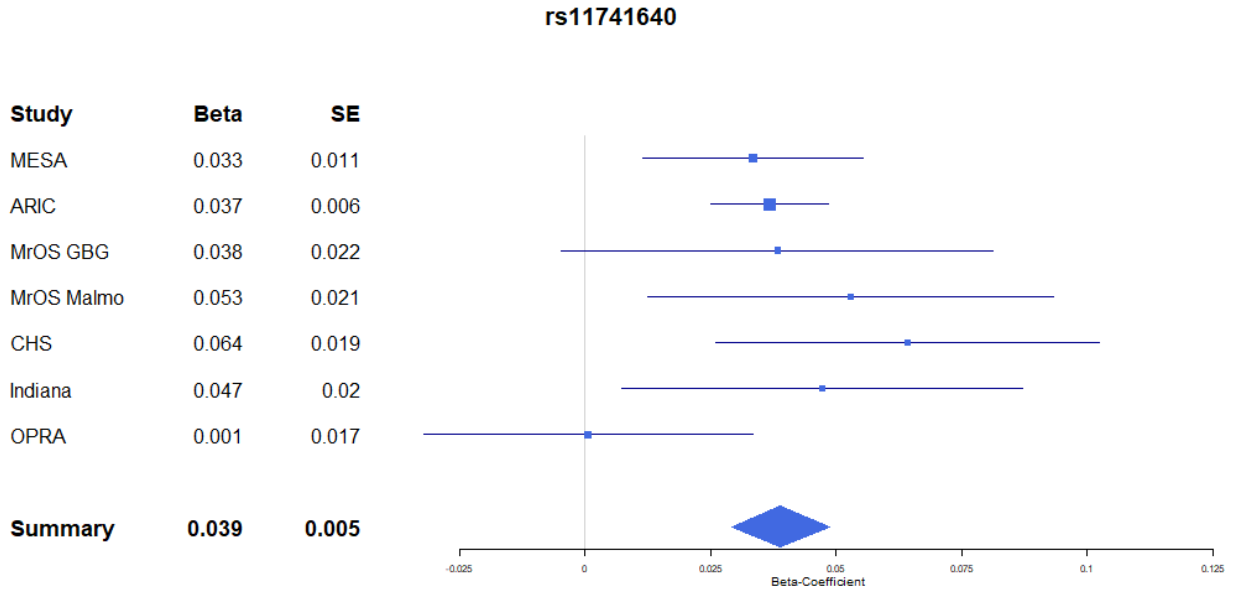

**Figure 4d. Forest plot of beta-coefficients for rs17479566 from individual studies (Model 1)**

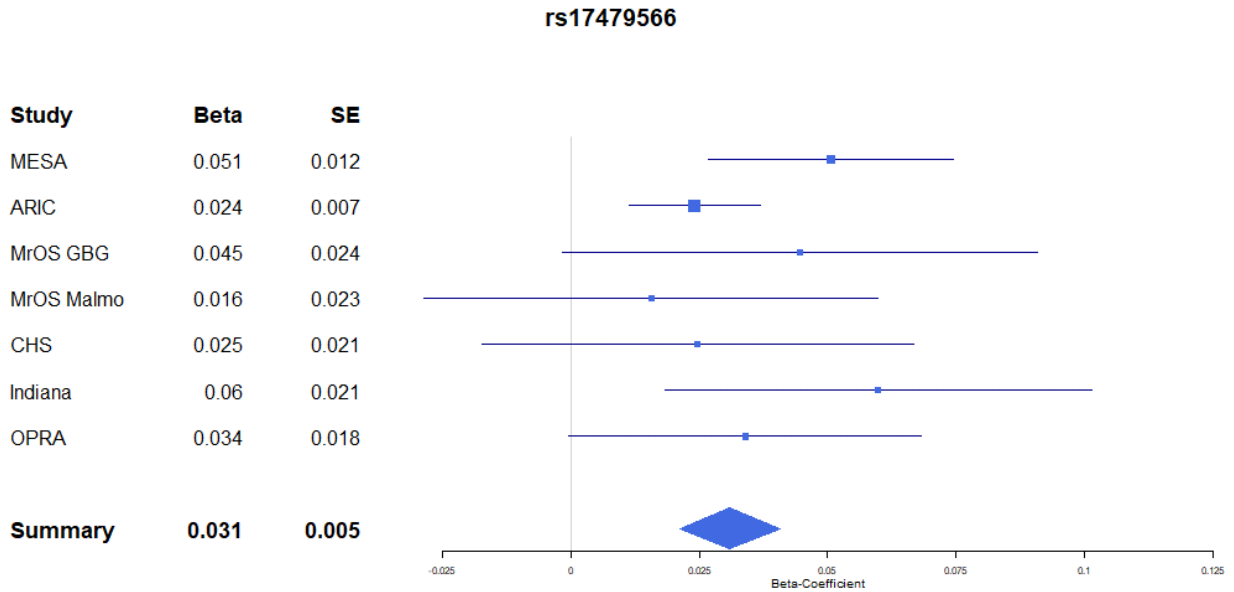

**Figure 4e. Forest plot of beta-coefficients for rs9925837 from individual studies (Model 1)**

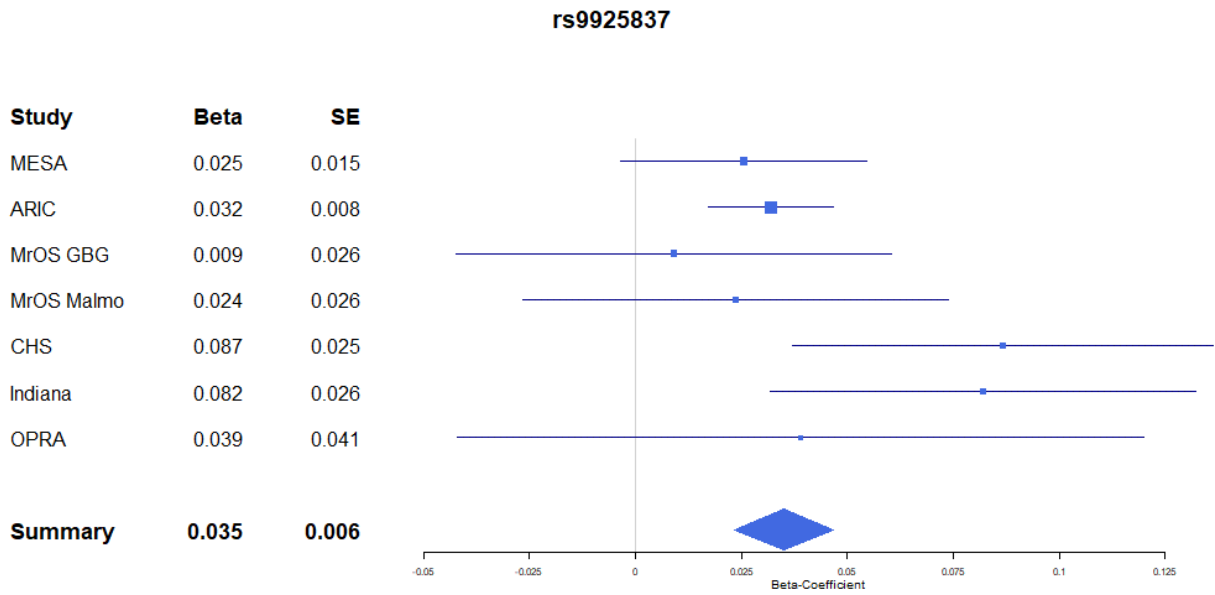

**Supplementary Table 2. Annotated SNPs demonstrating suggestive significance ( $P < 5 \times 10^{-6}$ ) (Model 1)**

| MarkerName | Effect Allele | Other Allele | Effect Allele Frequency | Effect | SE    | P.value.FE | P.value.RE | Chr   | Position  | Overlapped Gene | Nearest Upstream Gene | Nearest Downstream Gene |
|------------|---------------|--------------|-------------------------|--------|-------|------------|------------|-------|-----------|-----------------|-----------------------|-------------------------|
| rs17216707 | t             | c            | 0.7997                  | 0.0542 | 0.005 | 3.00E-24   | 1.10E-11   | chr20 | 52732362  |                 | BCAS1                 | CYP24A1                 |
| rs6127099  | a             | t            | 0.7207                  | 0.0477 | 0.005 | 4.16E-22   | 5.80E-16   | chr20 | 52731402  |                 | BCAS1                 | CYP24A1                 |
| rs2769071  | a             | g            | 0.6491                  | -0.037 | 0.005 | 6.08E-17   | 4.79E-07   | chr9  | 136145974 | ABO             |                       |                         |
| rs527210   | t             | c            | 0.3428                  | 0.038  | 0.005 | 6.38E-17   | 3.49E-07   | chr9  | 136146431 | ABO             |                       |                         |
| rs687289   | a             | g            | 0.3434                  | 0.0379 | 0.005 | 7.34E-17   | 1.42E-06   | chr9  | 136137106 | ABO             |                       |                         |
| rs543040   | a             | t            | 0.6583                  | -0.038 | 0.005 | 1.06E-16   | 6.00E-07   | chr9  | 136143000 | ABO             |                       |                         |
| rs8121940  | c             | g            | 0.7902                  | 0.0457 | 0.006 | 1.13E-16   | 4.80E-19   | chr20 | 52742306  |                 | BCAS1                 | CYP24A1                 |
| rs35194449 | t             | c            | 0.2095                  | -0.046 | 0.006 | 1.18E-16   | 4.84E-19   | chr20 | 52742047  |                 | BCAS1                 | CYP24A1                 |
| rs505922   | t             | c            | 0.6516                  | -0.037 | 0.005 | 1.43E-16   | 7.37E-07   | chr9  | 136149229 | ABO             |                       |                         |
| rs8176663  | t             | c            | 0.6501                  | -0.037 | 0.005 | 1.56E-16   | 6.74E-07   | chr9  | 136144427 | ABO             |                       |                         |
| rs11741640 | a             | g            | 0.2684                  | -0.039 | 0.005 | 1.59E-16   | 6.10E-17   | chr5  | 176792743 | RGS14           |                       |                         |
| rs17217119 | a             | g            | 0.79                    | 0.0451 | 0.006 | 1.63E-16   | 3.72E-17   | chr20 | 52742590  |                 | BCAS1                 | CYP24A1                 |
| rs6013897  | a             | t            | 0.2102                  | -0.045 | 0.006 | 1.66E-16   | 7.48E-19   | chr20 | 52742479  |                 | BCAS1                 | CYP24A1                 |
| rs529565   | t             | c            | 0.6519                  | -0.037 | 0.005 | 1.69E-16   | 7.25E-07   | chr9  | 136149500 | ABO             |                       |                         |
| rs491626   | t             | c            | 0.3484                  | 0.037  | 0.005 | 1.76E-16   | 7.29E-07   | chr9  | 136144873 | ABO             |                       |                         |
| rs514659   | a             | c            | 0.6503                  | -0.037 | 0.005 | 1.77E-16   | 7.00E-07   | chr9  | 136142203 | ABO             |                       |                         |
| rs492488   | a             | g            | 0.3504                  | 0.0369 | 0.005 | 1.86E-16   | 7.36E-07   | chr9  | 136144960 | ABO             |                       |                         |
| rs545971   | t             | c            | 0.3497                  | 0.0369 | 0.005 | 1.88E-16   | 6.94E-07   | chr9  | 136143372 | ABO             |                       |                         |
| rs554833   | t             | c            | 0.3499                  | 0.0369 | 0.005 | 1.89E-16   | 7.52E-07   | chr9  | 136147160 | ABO             |                       |                         |
| rs674302   | a             | t            | 0.3498                  | 0.0369 | 0.005 | 1.94E-16   | 7.76E-07   | chr9  | 136146664 | ABO             |                       |                         |
| rs676457   | a             | t            | 0.6504                  | -0.037 | 0.005 | 1.98E-16   | 7.79E-07   | chr9  | 136146227 | ABO             |                       |                         |
| rs493246   | a             | g            | 0.3507                  | 0.0368 | 0.005 | 1.99E-16   | 6.82E-07   | chr9  | 136144994 | ABO             |                       |                         |
| rs495203   | t             | c            | 0.3505                  | 0.0368 | 0.005 | 2.12E-16   | 7.58E-07   | chr9  | 136145240 | ABO             |                       |                         |
| rs582094   | a             | t            | 0.6502                  | -0.037 | 0.005 | 2.22E-16   | 7.01E-07   | chr9  | 136145484 | ABO             |                       |                         |

|            |   |   |        |        |       |          |          |       |           |       |       |         |
|------------|---|---|--------|--------|-------|----------|----------|-------|-----------|-------|-------|---------|
| rs582118   | a | g | 0.6502 | -0.037 | 0.005 | 2.22E-16 | 7.01E-07 | chr9  | 136145471 | ABO   |       |         |
| rs687621   | a | g | 0.6492 | -0.037 | 0.005 | 2.55E-16 | 1.09E-06 | chr9  | 136137065 | ABO   |       |         |
| rs11746443 | a | g | 0.2675 | -0.039 | 0.005 | 6.67E-16 | 6.16E-11 | chr5  | 176798306 | RGS14 |       |         |
| rs612169   | a | g | 0.6509 | -0.036 | 0.005 | 9.10E-16 | 1.16E-06 | chr9  | 136143442 | ABO   |       |         |
| rs11748297 | a | g | 0.2758 | -0.038 | 0.005 | 9.96E-16 | 3.74E-16 | chr5  | 176800361 |       | RGS14 | SLC34A1 |
| rs4075958  | a | g | 0.2687 | -0.038 | 0.005 | 1.04E-15 | 2.91E-15 | chr5  | 176784512 |       | LMAN2 | RGS14   |
| rs11748165 | t | c | 0.2788 | -0.038 | 0.005 | 1.13E-15 | 4.09E-16 | chr5  | 176800054 |       | RGS14 | SLC34A1 |
| rs2870308  | a | c | 0.2918 | -0.039 | 0.005 | 1.96E-15 | 1.37E-17 | chr20 | 52727953  |       | BCAS1 | CYP24A1 |
| rs677355   | a | g | 0.3407 | 0.0362 | 0.005 | 2.15E-15 | 8.82E-07 | chr9  | 136146046 | ABO   |       |         |
| rs4074995  | a | g | 0.2771 | -0.037 | 0.005 | 2.31E-15 | 1.35E-09 | chr5  | 176797343 | RGS14 |       |         |
| rs13153019 | t | c | 0.7444 | 0.0392 | 0.005 | 2.33E-15 | 8.73E-16 | chr5  | 176782218 |       | LMAN2 | RGS14   |
| rs209956   | a | g | 0.7208 | 0.0373 | 0.005 | 2.78E-15 | 2.65E-16 | chr20 | 52722856  |       | BCAS1 | CYP24A1 |
| rs209954   | a | t | 0.7204 | 0.0373 | 0.005 | 3.10E-15 | 2.68E-16 | chr20 | 52722943  |       | BCAS1 | CYP24A1 |
| rs209955   | t | c | 0.2796 | -0.037 | 0.005 | 3.14E-15 | 6.45E-17 | chr20 | 52722871  |       | BCAS1 | CYP24A1 |
| rs10051765 | t | c | 0.6765 | 0.0378 | 0.005 | 3.19E-15 | 8.61E-12 | chr5  | 176799992 |       | RGS14 | SLC34A1 |
| rs56235845 | t | g | 0.6884 | 0.0383 | 0.005 | 3.90E-15 | 1.25E-15 | chr5  | 176798040 | RGS14 |       |         |
| rs676996   | t | g | 0.6589 | -0.036 | 0.005 | 3.96E-15 | 1.03E-06 | chr9  | 136146077 | ABO   |       |         |
| rs209957   | a | g | 0.72   | 0.0369 | 0.005 | 4.93E-15 | 1.09E-16 | chr20 | 52721095  |       | BCAS1 | CYP24A1 |
| rs576125   | a | g | 0.3187 | 0.0371 | 0.005 | 7.29E-15 | 2.32E-06 | chr9  | 136144309 | ABO   |       |         |
| rs597974   | a | g | 0.6802 | -0.037 | 0.005 | 9.58E-15 | 2.93E-06 | chr9  | 136144297 | ABO   |       |         |
| rs643434   | a | g | 0.3711 | 0.0342 | 0.005 | 1.68E-14 | 5.84E-07 | chr9  | 136142355 | ABO   |       |         |
| rs657152   | a | c | 0.372  | 0.0341 | 0.005 | 1.76E-14 | 6.04E-07 | chr9  | 136139265 | ABO   |       |         |
| rs597988   | a | t | 0.3202 | 0.0364 | 0.005 | 1.79E-14 | 2.15E-06 | chr9  | 136144284 | ABO   |       |         |
| rs644234   | t | g | 0.629  | -0.034 | 0.005 | 1.85E-14 | 5.44E-07 | chr9  | 136142217 | ABO   |       |         |
| rs544873   | a | g | 0.3707 | 0.0341 | 0.005 | 1.92E-14 | 5.65E-07 | chr9  | 136143212 | ABO   |       |         |
| rs494242   | t | c | 0.3718 | 0.034  | 0.005 | 2.19E-14 | 6.35E-07 | chr9  | 136145118 | ABO   |       |         |
| rs12654812 | a | g | 0.3272 | -0.036 | 0.005 | 5.45E-14 | 4.52E-10 | chr5  | 176794191 | RGS14 |       |         |
| rs550057   | t | c | 0.2741 | 0.0361 | 0.005 | 6.51E-14 | 3.00E-07 | chr9  | 136146597 | ABO   |       |         |
| rs543968   | t | c | 0.6413 | -0.034 | 0.005 | 7.51E-14 | 4.78E-07 | chr9  | 136143121 | ABO   |       |         |
| rs613534   | a | g | 0.6412 | -0.034 | 0.005 | 7.54E-14 | 4.82E-07 | chr9  | 136143120 | ABO   |       |         |

|            |   |   |        |        |       |          |          |       |           |         |       |         |
|------------|---|---|--------|--------|-------|----------|----------|-------|-----------|---------|-------|---------|
| rs9411378  | a | c | 0.245  | 0.0385 | 0.005 | 1.29E-13 | 4.14E-07 | chr9  | 136145425 | ABO     |       |         |
| rs4075959  | a | g | 0.286  | -0.035 | 0.005 | 1.44E-13 | 5.51E-14 | chr5  | 176784612 |         | LMAN2 | RGS14   |
| rs4976688  | t | c | 0.7138 | 0.0347 | 0.005 | 1.44E-13 | 5.52E-14 | chr5  | 176784439 |         | LMAN2 | RGS14   |
| rs209958   | t | g | 0.2785 | -0.035 | 0.005 | 1.47E-13 | 2.44E-14 | chr20 | 52717172  |         | BCAS1 | CYP24A1 |
| rs158530   | a | g | 0.2911 | -0.034 | 0.005 | 3.36E-13 | 8.08E-14 | chr20 | 52720530  |         | BCAS1 | CYP24A1 |
| rs11135015 | t | c | 0.6774 | 0.0344 | 0.005 | 4.92E-13 | 1.59E-13 | chr5  | 176792557 | RGS14   |       |         |
| rs6556313  | a | g | 0.676  | 0.0344 | 0.005 | 5.00E-13 | 1.67E-13 | chr5  | 176792491 | RGS14   |       |         |
| rs67111717 | a | g | 0.6724 | 0.034  | 0.005 | 1.00E-12 | 3.37E-13 | chr5  | 176790162 | RGS14   |       |         |
| rs4976647  | a | c | 0.6745 | 0.0338 | 0.005 | 1.33E-12 | 4.55E-13 | chr5  | 176788622 | RGS14   |       |         |
| rs4976646  | t | c | 0.6729 | 0.0337 | 0.005 | 1.54E-12 | 1.33E-12 | chr5  | 176788570 | RGS14   |       |         |
| rs4976689  | c | g | 0.6779 | 0.0331 | 0.005 | 2.51E-12 | 9.31E-13 | chr5  | 176784448 |         | LMAN2 | RGS14   |
| rs7713145  | a | g | 0.2807 | -0.035 | 0.005 | 6.33E-12 | 3.13E-12 | chr5  | 176781209 |         | LMAN2 | RGS14   |
| rs4131290  | a | c | 0.7042 | 0.0323 | 0.005 | 1.31E-11 | 8.72E-12 | chr5  | 176780682 |         | LMAN2 | RGS14   |
| rs2762918  | t | c | 0.8388 | 0.0403 | 0.006 | 1.55E-11 | 5.20E-12 | chr20 | 52744121  |         | BCAS1 | CYP24A1 |
| rs2585448  | c | g | 0.8387 | 0.0399 | 0.006 | 2.13E-11 | 7.24E-12 | chr20 | 52744537  |         | BCAS1 | CYP24A1 |
| rs2762919  | t | c | 0.8387 | 0.0398 | 0.006 | 2.18E-11 | 7.48E-12 | chr20 | 52744742  |         | BCAS1 | CYP24A1 |
| rs2585449  | a | g | 0.1614 | -0.04  | 0.006 | 2.27E-11 | 7.77E-12 | chr20 | 52744679  |         | BCAS1 | CYP24A1 |
| rs2585447  | t | c | 0.8388 | 0.0399 | 0.006 | 2.34E-11 | 7.95E-12 | chr20 | 52744437  |         | BCAS1 | CYP24A1 |
| rs2616278  | t | c | 0.8387 | 0.0398 | 0.006 | 2.41E-11 | 8.24E-12 | chr20 | 52744525  |         | BCAS1 | CYP24A1 |
| rs2616279  | t | c | 0.1623 | -0.04  | 0.006 | 2.49E-11 | 8.52E-12 | chr20 | 52743897  |         | BCAS1 | CYP24A1 |
| rs532436   | a | g | 0.2052 | 0.0359 | 0.005 | 2.83E-11 | 2.02E-07 | chr9  | 136149830 | ABO     |       |         |
| rs507666   | a | g | 0.2052 | 0.0359 | 0.005 | 2.85E-11 | 4.20E-06 | chr9  | 136149399 | ABO     |       |         |
| rs33921462 | a | g | 0.2675 | -0.034 | 0.005 | 2.88E-11 | 3.99E-10 | chr5  | 176814656 | SLC34A1 |       |         |
| rs635634   | t | c | 0.2046 | 0.0357 | 0.005 | 3.40E-11 | 2.07E-07 | chr9  | 136155000 |         | ABO   | Y_RNA   |
| rs458385   | a | t | 0.6881 | 0.0312 | 0.005 | 3.50E-11 | 2.50E-11 | chr20 | 52715186  |         | BCAS1 | CYP24A1 |
| rs458386   | a | t | 0.6825 | 0.0312 | 0.005 | 3.78E-11 | 2.74E-11 | chr20 | 52715187  |         | BCAS1 | CYP24A1 |
| rs2616277  | t | c | 0.1609 | -0.039 | 0.006 | 4.07E-11 | 3.28E-12 | chr20 | 52745040  |         | BCAS1 | CYP24A1 |
| rs5030873  | t | c | 0.6864 | 0.0324 | 0.005 | 1.09E-10 | 6.88E-11 | chr5  | 176815124 | SLC34A1 |       |         |
| rs12659266 | t | c | 0.2449 | -0.032 | 0.005 | 1.10E-10 | 6.47E-11 | chr5  | 176807197 | SLC34A1 |       |         |
| rs2519093  | t | c | 0.202  | 0.0349 | 0.005 | 1.27E-10 | 7.49E-07 | chr9  | 136141870 | ABO     |       |         |

|             |   |   |        |        |       |          |          |       |           |         |       |         |
|-------------|---|---|--------|--------|-------|----------|----------|-------|-----------|---------|-------|---------|
| rs6556314   | t | c | 0.3157 | -0.032 | 0.005 | 1.33E-10 | 8.62E-11 | chr5  | 176819252 | SLC34A1 |       |         |
| rs35610898  | c | g | 0.3142 | -0.032 | 0.005 | 1.36E-10 | 8.71E-11 | chr5  | 176815766 | SLC34A1 |       |         |
| rs35630910  | a | c | 0.7064 | 0.0297 | 0.005 | 1.46E-10 | 1.04E-10 | chr5  | 176757841 |         | MXD3  | LMAN2   |
| rs6862195   | t | g | 0.3158 | -0.032 | 0.005 | 1.70E-10 | 1.12E-10 | chr5  | 176822512 | SLC34A1 |       |         |
| rs158529    | t | c | 0.6591 | 0.0287 | 0.005 | 1.73E-10 | 9.01E-11 | chr20 | 52721424  |         | BCAS1 | CYP24A1 |
| rs6420095   | a | c | 0.6842 | 0.0322 | 0.005 | 1.73E-10 | 1.15E-10 | chr5  | 176821449 | SLC34A1 |       |         |
| rs6420094   | a | g | 0.6843 | 0.032  | 0.005 | 1.76E-10 | 1.19E-10 | chr5  | 176817636 | SLC34A1 |       |         |
| rs35716097  | t | c | 0.2894 | -0.032 | 0.005 | 1.77E-10 | 1.99E-06 | chr5  | 176806636 | SLC34A1 |       |         |
| rs3812035   | t | g | 0.3155 | -0.032 | 0.005 | 1.79E-10 | 1.87E-07 | chr5  | 176817143 | SLC34A1 |       |         |
| rs139415780 | a | g | 0.1559 | -0.038 | 0.006 | 1.81E-10 | 7.74E-11 | chr20 | 52747748  |         | BCAS1 | CYP24A1 |
| rs2762921   | a | g | 0.156  | -0.037 | 0.006 | 2.00E-10 | 8.82E-11 | chr20 | 52749937  |         | BCAS1 | CYP24A1 |
| rs158523    | t | c | 0.6602 | 0.0286 | 0.005 | 2.04E-10 | 1.07E-10 | chr20 | 52724309  |         | BCAS1 | CYP24A1 |
| rs210068    | a | g | 0.3392 | -0.029 | 0.005 | 2.06E-10 | 1.12E-10 | chr20 | 52726291  |         | BCAS1 | CYP24A1 |
| rs158520    | t | c | 0.3398 | -0.029 | 0.005 | 2.12E-10 | 1.11E-10 | chr20 | 52724718  |         | BCAS1 | CYP24A1 |
| rs158527    | c | g | 0.3399 | -0.029 | 0.005 | 2.12E-10 | 1.11E-10 | chr20 | 52722150  |         | BCAS1 | CYP24A1 |
| rs10866705  | a | c | 0.7438 | 0.0312 | 0.005 | 2.16E-10 | 1.24E-10 | chr5  | 176801131 |         | RGS14 | SLC34A1 |
| rs6556316   | t | c | 0.3156 | -0.032 | 0.005 | 2.19E-10 | 1.46E-10 | chr5  | 176821375 | SLC34A1 |       |         |
| rs158526    | a | t | 0.6601 | 0.0285 | 0.005 | 2.21E-10 | 1.16E-10 | chr20 | 52722628  |         | BCAS1 | CYP24A1 |
| rs158525    | t | c | 0.6599 | 0.0285 | 0.005 | 2.24E-10 | 1.17E-10 | chr20 | 52722810  |         | BCAS1 | CYP24A1 |
| rs158528    | a | g | 0.34   | -0.029 | 0.005 | 2.25E-10 | 2.07E-11 | chr20 | 52721956  |         | BCAS1 | CYP24A1 |
| rs67190252  | t | c | 0.2089 | -0.038 | 0.006 | 2.54E-10 | 9.67E-11 | chr5  | 176781905 |         | LMAN2 | RGS14   |
| rs158521    | t | c | 0.34   | -0.028 | 0.005 | 2.74E-10 | 1.45E-10 | chr20 | 52724665  |         | BCAS1 | CYP24A1 |
| rs2762920   | a | g | 0.1561 | -0.037 | 0.006 | 2.86E-10 | 1.32E-10 | chr20 | 52749823  |         | BCAS1 | CYP24A1 |
| rs7447593   | c | g | 0.6844 | 0.0321 | 0.005 | 3.87E-10 | 2.66E-10 | chr5  | 176824137 | SLC34A1 |       |         |
| rs3812036   | t | c | 0.2527 | -0.03  | 0.005 | 1.08E-09 | 6.44E-10 | chr5  | 176813404 | SLC34A1 |       |         |
| rs34604271  | t | c | 0.2986 | -0.028 | 0.005 | 1.11E-09 | 9.90E-10 | chr5  | 176775851 | LMAN2   |       |         |
| rs62397245  | c | g | 0.7688 | 0.0309 | 0.005 | 1.15E-09 | 8.47E-10 | chr5  | 176750688 |         | MXD3  | LMAN2   |
| rs6860069   | t | c | 0.3092 | -0.028 | 0.005 | 1.17E-09 | 6.53E-10 | chr5  | 176755841 |         | MXD3  | LMAN2   |
| rs34316179  | a | g | 0.3184 | -0.028 | 0.005 | 1.75E-09 | 8.39E-10 | chr5  | 176779689 |         | LMAN2 | RGS14   |
| rs55785724  | a | t | 0.6815 | 0.03   | 0.005 | 1.82E-09 | 1.49E-09 | chr5  | 176817583 | SLC34A1 |       |         |



|             |   |   |        |        |       |          |          |       |           |               |               |              |
|-------------|---|---|--------|--------|-------|----------|----------|-------|-----------|---------------|---------------|--------------|
| rs113955164 | a | g | 0.2233 | -0.032 | 0.005 | 1.97E-09 | 1.31E-09 | chr5  | 176750988 |               | MXD3          | LMAN2        |
| rs151014368 | a | g | 0.2216 | -0.031 | 0.005 | 2.01E-09 | 1.30E-09 | chr5  | 176751059 |               | MXD3          | LMAN2        |
| rs17479566  | t | c | 0.2207 | 0.0313 | 0.005 | 2.01E-09 | 7.17E-07 | chr9  | 71198014  | RP11-274B18.4 |               |              |
| rs4131289   | a | g | 0.3211 | -0.028 | 0.005 | 2.27E-09 | 1.15E-09 | chr5  | 176780545 |               | LMAN2         | RGS14        |
| rs2026351   | a | g | 0.2221 | 0.0309 | 0.005 | 2.47E-09 | 1.00E-06 | chr9  | 71194024  | RP11-274B18.4 |               |              |
| rs72716037  | t | c | 0.2221 | 0.0308 | 0.005 | 2.58E-09 | 8.67E-07 | chr9  | 71194967  | RP11-274B18.4 |               |              |
| rs954453    | t | c | 0.2215 | 0.0306 | 0.005 | 3.37E-09 | 5.70E-09 | chr9  | 71186301  | RP11-274B18.4 |               |              |
| rs630510    | a | g | 0.4679 | -0.025 | 0.004 | 3.40E-09 | 1.12E-05 | chr9  | 136149581 | ABO           |               |              |
| rs600038    | t | c | 0.7738 | -0.031 | 0.005 | 3.61E-09 | 6.41E-08 | chr9  | 136151806 |               | ABO           | Y_RNA        |
| rs630014    | a | g | 0.468  | -0.025 | 0.004 | 3.69E-09 | 8.83E-05 | chr9  | 136149722 | ABO           |               |              |
| rs12237628  | t | c | 0.7763 | -0.031 | 0.005 | 4.04E-09 | 8.26E-07 | chr9  | 71187957  | RP11-274B18.4 |               |              |
| rs495828    | t | g | 0.226  | 0.0307 | 0.005 | 4.18E-09 | 1.17E-07 | chr9  | 136154867 |               | ABO           | Y_RNA        |
| rs13362309  | a | g | 0.6819 | 0.0277 | 0.005 | 4.31E-09 | 2.51E-09 | chr5  | 176780137 |               | LMAN2         | RGS14        |
| rs13190259  | t | c | 0.3003 | -0.028 | 0.005 | 4.38E-09 | 2.05E-09 | chr5  | 176768110 | LMAN2         |               |              |
| rs651007    | t | c | 0.226  | 0.0305 | 0.005 | 4.84E-09 | 6.48E-08 | chr9  | 136153875 |               | ABO           | Y_RNA        |
| rs1888722   | t | g | 0.2128 | 0.0304 | 0.005 | 4.95E-09 | 1.02E-07 | chr9  | 71218049  | RP11-274B18.4 |               |              |
| rs9925837   | a | g | 0.8519 | -0.035 | 0.006 | 5.11E-09 | 1.39E-04 | chr16 | 79927303  |               | RP11-345M22.3 | RP11-148M9.1 |
| rs579459    | t | c | 0.7742 | -0.031 | 0.005 | 5.23E-09 | 1.15E-06 | chr9  | 136154168 |               | ABO           | Y_RNA        |
| rs209961    | t | c | 0.2847 | -0.028 | 0.005 | 5.75E-09 | 2.72E-09 | chr20 | 52715154  |               | BCAS1         | CYP24A1      |
| rs649129    | t | c | 0.2252 | 0.0305 | 0.005 | 5.78E-09 | 6.88E-08 | chr9  | 136154304 |               | ABO           | Y_RNA        |
| rs209960    | t | c | 0.2852 | -0.027 | 0.005 | 6.73E-09 | 4.80E-10 | chr20 | 52716084  |               | BCAS1         | CYP24A1      |
| rs13190105  | a | g | 0.7105 | 0.0281 | 0.005 | 6.79E-09 | 3.41E-09 | chr5  | 176768090 | LMAN2         |               |              |
| rs4976645   | a | g | 0.321  | -0.027 | 0.005 | 6.86E-09 | 3.61E-09 | chr5  | 176777493 | LMAN2         |               |              |
| rs58256061  | a | g | 0.2142 | 0.03   | 0.005 | 7.62E-09 | 1.76E-07 | chr9  | 71199513  | RP11-274B18.4 |               |              |
| rs11644393  | a | t | 0.1572 | 0.0335 | 0.006 | 7.70E-09 | 2.63E-04 | chr16 | 79928128  |               | RP11-345M22.3 | RP11-148M9.1 |
| rs2585412   | a | t | 0.1494 | -0.035 | 0.006 | 7.89E-09 | 4.04E-09 | chr20 | 52758649  |               | BCAS1         | CYP24A1      |
| rs4397143   | a | c | 0.6789 | 0.0266 | 0.005 | 8.08E-09 | 4.31E-09 | chr5  | 176777022 | LMAN2         |               |              |
| rs35582636  | a | c | 0.2521 | -0.029 | 0.005 | 8.18E-09 | 5.41E-09 | chr5  | 176759778 | LMAN2         |               |              |
| rs111566909 | a | g | 0.6918 | 0.0265 | 0.005 | 8.68E-09 | 5.35E-09 | chr5  | 176767817 | LMAN2         |               |              |
| rs17479209  | a | g | 0.2036 | 0.0302 | 0.005 | 8.84E-09 | 3.14E-06 | chr9  | 71178959  | RP11-274B18.4 |               |              |

|            |   |   |        |        |       |          |          |       |           |               |               |              |
|------------|---|---|--------|--------|-------|----------|----------|-------|-----------|---------------|---------------|--------------|
| rs10869048 | a | c | 0.7959 | -0.03  | 0.005 | 9.35E-09 | 4.40E-08 | chr9  | 71178178  | RP11-274B18.4 |               |              |
| rs2762928  | a | t | 0.8504 | 0.0343 | 0.006 | 1.05E-08 | 5.64E-09 | chr20 | 52766085  |               | BCAS1         | CYP24A1      |
| rs869950   | a | t | 0.7968 | -0.03  | 0.005 | 1.10E-08 | 3.95E-06 | chr9  | 71179545  | RP11-274B18.4 |               |              |
| rs13157098 | a | g | 0.144  | -0.038 | 0.007 | 1.17E-08 | 3.98E-07 | chr5  | 176802250 |               | RGS14         | SLC34A1      |
| rs4627365  | t | c | 0.1449 | 0.0342 | 0.006 | 1.21E-08 | 4.00E-05 | chr16 | 79932213  |               | RP11-345M22.3 | RP11-148M9.1 |
| rs11143037 | t | c | 0.2158 | 0.0293 | 0.005 | 1.28E-08 | 3.26E-07 | chr9  | 71208171  | RP11-274B18.4 |               |              |
| rs11649114 | a | g | 0.8489 | -0.033 | 0.006 | 1.58E-08 | 4.14E-04 | chr16 | 79924857  |               | RP11-345M22.3 | RP11-148M9.1 |
| rs28384289 | t | c | 0.1507 | 0.033  | 0.006 | 1.61E-08 | 2.88E-04 | chr16 | 79925400  |               | RP11-345M22.3 | RP11-148M9.1 |
| rs11646139 | a | g | 0.1506 | 0.033  | 0.006 | 1.62E-08 | 2.82E-04 | chr16 | 79926321  |               | RP11-345M22.3 | RP11-148M9.1 |
| rs9935686  | a | c | 0.1506 | 0.033  | 0.006 | 1.62E-08 | 2.91E-04 | chr16 | 79927218  |               | RP11-345M22.3 | RP11-148M9.1 |
| rs11644400 | t | c | 0.849  | -0.033 | 0.006 | 1.65E-08 | 2.46E-05 | chr16 | 79928186  |               | RP11-345M22.3 | RP11-148M9.1 |
| rs9925120  | c | g | 0.849  | -0.033 | 0.006 | 1.72E-08 | 1.31E-07 | chr16 | 79941214  |               | RP11-345M22.3 | RP11-148M9.1 |
| rs4745134  | t | c | 0.7836 | -0.029 | 0.005 | 1.73E-08 | 6.08E-07 | chr9  | 71205791  | RP11-274B18.4 |               |              |
| rs4745135  | t | c | 0.7836 | -0.029 | 0.005 | 1.74E-08 | 6.16E-07 | chr9  | 71205800  | RP11-274B18.4 |               |              |
| rs11647905 | c | g | 0.1508 | 0.033  | 0.006 | 1.75E-08 | 2.83E-04 | chr16 | 79928065  |               | RP11-345M22.3 | RP11-148M9.1 |
| rs9928026  | a | g | 0.8493 | -0.033 | 0.006 | 1.78E-08 | 2.87E-04 | chr16 | 79927537  |               | RP11-345M22.3 | RP11-148M9.1 |
| rs4078173  | a | g | 0.8497 | -0.033 | 0.006 | 1.83E-08 | 4.71E-06 | chr16 | 79932332  |               | RP11-345M22.3 | RP11-148M9.1 |
| rs2762932  | t | c | 0.8501 | 0.0336 | 0.006 | 1.96E-08 | 2.06E-09 | chr20 | 52768391  |               | BCAS1         | CYP24A1      |
| rs13330604 | a | t | 0.8497 | -0.033 | 0.006 | 2.03E-08 | 2.93E-04 | chr16 | 79926101  |               | RP11-345M22.3 | RP11-148M9.1 |
| rs11641371 | t | c | 0.1488 | 0.0331 | 0.006 | 2.03E-08 | 9.83E-09 | chr16 | 79940725  |               | RP11-345M22.3 | RP11-148M9.1 |
| rs11641245 | c | g | 0.8482 | -0.033 | 0.006 | 2.13E-08 | 4.71E-07 | chr16 | 79940478  |               | RP11-345M22.3 | RP11-148M9.1 |
| rs11641084 | c | g | 0.1507 | 0.0327 | 0.006 | 2.16E-08 | 1.50E-07 | chr16 | 79940800  |               | RP11-345M22.3 | RP11-148M9.1 |
| rs9925132  | t | c | 0.1508 | 0.0327 | 0.006 | 2.18E-08 | 1.58E-07 | chr16 | 79941233  |               | RP11-345M22.3 | RP11-148M9.1 |
| rs2616275  | t | c | 0.215  | -0.03  | 0.005 | 2.28E-08 | 1.15E-08 | chr20 | 52745825  |               | BCAS1         | CYP24A1      |
| rs7188156  | t | g | 0.8491 | -0.033 | 0.006 | 2.52E-08 | 2.49E-06 | chr16 | 79938114  |               | RP11-345M22.3 | RP11-148M9.1 |
| rs16951648 | c | g | 0.1527 | 0.0323 | 0.006 | 2.67E-08 | 4.17E-06 | chr16 | 79942149  |               | RP11-345M22.3 | RP11-148M9.1 |
| rs12103233 | a | c | 0.8487 | -0.032 | 0.006 | 2.70E-08 | 4.67E-07 | chr16 | 79941973  |               | RP11-345M22.3 | RP11-148M9.1 |
| rs7189003  | a | t | 0.1508 | 0.0324 | 0.006 | 2.79E-08 | 1.50E-07 | chr16 | 79939801  |               | RP11-345M22.3 | RP11-148M9.1 |
| rs28623477 | a | g | 0.8482 | -0.032 | 0.006 | 2.80E-08 | 2.17E-06 | chr16 | 79942318  |               | RP11-345M22.3 | RP11-148M9.1 |
| rs8053565  | t | g | 0.1517 | 0.0323 | 0.006 | 2.83E-08 | 1.40E-07 | chr16 | 79941892  |               | RP11-345M22.3 | RP11-148M9.1 |

|            |   |   |        |        |       |          |          |       |           |               |               |              |
|------------|---|---|--------|--------|-------|----------|----------|-------|-----------|---------------|---------------|--------------|
| rs8060495  | a | g | 0.8493 | -0.033 | 0.006 | 2.92E-08 | 4.13E-07 | chr16 | 79942385  |               | RP11-345M22.3 | RP11-148M9.1 |
| rs9313758  | t | g | 0.678  | 0.025  | 0.005 | 2.98E-08 | 9.22E-09 | chr5  | 176773091 | LMAN2         |               |              |
| rs35286975 | c | g | 0.1519 | 0.0323 | 0.006 | 3.03E-08 | 2.20E-06 | chr16 | 79938996  |               | RP11-345M22.3 | RP11-148M9.1 |
| rs36102285 | t | c | 0.3207 | -0.025 | 0.005 | 3.03E-08 | 1.72E-08 | chr5  | 176774018 | LMAN2         |               |              |
| rs4532376  | a | g | 0.3208 | -0.025 | 0.005 | 3.07E-08 | 8.42E-09 | chr5  | 176774403 | LMAN2         |               |              |
| rs11142926 | t | g | 0.2747 | 0.027  | 0.005 | 3.13E-08 | 2.24E-05 | chr9  | 71176227  | RP11-274B18.4 |               |              |
| rs4745107  | a | g | 0.7242 | -0.027 | 0.005 | 3.29E-08 | 1.79E-08 | chr9  | 71177110  | RP11-274B18.4 |               |              |
| rs11748912 | a | g | 0.3224 | -0.025 | 0.005 | 3.42E-08 | 1.89E-08 | chr5  | 176765395 | LMAN2         |               |              |
| rs616154   | t | c | 0.5209 | 0.0238 | 0.004 | 3.46E-08 | 3.28E-05 | chr9  | 136150466 | ABO           |               |              |
| rs4976643  | a | c | 0.6774 | 0.0249 | 0.005 | 3.50E-08 | 1.96E-08 | chr5  | 176760227 | LMAN2         |               |              |
| rs11949401 | t | c | 0.6778 | 0.0248 | 0.005 | 3.53E-08 | 1.13E-08 | chr5  | 176765989 | LMAN2         |               |              |
| rs6876677  | t | c | 0.6777 | 0.0249 | 0.005 | 3.56E-08 | 2.02E-08 | chr5  | 176755342 |               | MXD3          | LMAN2        |
| rs12055081 | t | c | 0.3222 | -0.025 | 0.005 | 4.09E-08 | 2.32E-08 | chr5  | 176757191 |               | MXD3          | LMAN2        |
| rs4077451  | a | t | 0.8391 | -0.032 | 0.006 | 4.15E-08 | 7.96E-06 | chr16 | 79931720  |               | RP11-345M22.3 | RP11-148M9.1 |
| rs559723   | a | g | 0.4871 | -0.024 | 0.004 | 4.25E-08 | 2.55E-05 | chr9  | 136150484 | ABO           |               |              |
| rs6875461  | t | c | 0.6783 | 0.0246 | 0.005 | 4.67E-08 | 2.70E-08 | chr5  | 176754665 |               | MXD3          | LMAN2        |
| rs11738681 | a | g | 0.6774 | 0.0246 | 0.005 | 4.78E-08 | 2.72E-08 | chr5  | 176761535 | LMAN2         |               |              |
| rs11749830 | a | g | 0.323  | -0.025 | 0.005 | 4.80E-08 | 2.63E-08 | chr5  | 176766547 | LMAN2         |               |              |
| rs28581385 | a | t | 0.852  | -0.033 | 0.006 | 5.04E-08 | 2.81E-07 | chr16 | 79942679  |               | RP11-345M22.3 | RP11-148M9.1 |
| rs952436   | t | c | 0.2082 | 0.0287 | 0.005 | 5.13E-08 | 4.53E-09 | chr9  | 71219086  | RP11-274B18.4 |               |              |
| rs8058927  | a | g | 0.151  | 0.032  | 0.006 | 5.83E-08 | 8.24E-10 | chr16 | 79942562  |               | RP11-345M22.3 | RP11-148M9.1 |
| rs2252316  | a | g | 0.1396 | -0.043 | 0.008 | 6.49E-08 | 5.41E-08 | chr5  | 176837504 | GRK6          |               |              |
| rs28555498 | a | g | 0.8453 | -0.032 | 0.006 | 6.70E-08 | 8.13E-09 | chr16 | 79942776  |               | RP11-345M22.3 | RP11-148M9.1 |
| rs581107   | t | c | 0.5602 | 0.0233 | 0.004 | 7.98E-08 | 1.25E-03 | chr9  | 136147702 | ABO           |               |              |
| rs475419   | t | c | 0.5581 | 0.0232 | 0.004 | 8.68E-08 | 1.27E-03 | chr9  | 136148231 | ABO           |               |              |
| rs28446901 | c | g | 0.8145 | -0.03  | 0.006 | 9.71E-08 | 6.81E-04 | chr9  | 136308796 | ADAMTS13      |               |              |
| rs645982   | a | g | 0.4415 | -0.023 | 0.004 | 9.93E-08 | 1.21E-03 | chr9  | 136148409 | ABO           |               |              |
| rs473533   | t | c | 0.4415 | -0.023 | 0.004 | 1.06E-07 | 1.28E-03 | chr9  | 136148035 | ABO           |               |              |
| rs476410   | c | g | 0.5586 | 0.023  | 0.004 | 1.06E-07 | 1.31E-03 | chr9  | 136148368 | ABO           |               |              |
| rs659104   | t | g | 0.4414 | -0.023 | 0.004 | 1.10E-07 | 1.33E-03 | chr9  | 136147823 | ABO           |               |              |

|            |   |   |        |        |       |          |          |       |           |               |               |               |
|------------|---|---|--------|--------|-------|----------|----------|-------|-----------|---------------|---------------|---------------|
| rs660340   | a | g | 0.4414 | -0.023 | 0.004 | 1.11E-07 | 1.33E-03 | chr9  | 136147553 | ABO           |               |               |
| rs8054786  | c | g | 0.8417 | -0.031 | 0.006 | 1.17E-07 | 1.31E-07 | chr16 | 79941881  |               | RP11-345M22.3 | RP11-148M9.1  |
| rs62397242 | a | c | 0.2379 | -0.027 | 0.005 | 1.24E-07 | 8.71E-08 | chr5  | 176738538 | MXD3          |               |               |
| rs500498   | t | c | 0.4599 | -0.023 | 0.004 | 1.25E-07 | 1.27E-03 | chr9  | 136148647 | ABO           |               |               |
| rs244730   | a | g | 0.2435 | -0.026 | 0.005 | 1.30E-07 | 8.18E-08 | chr5  | 176539212 |               | FGFR4         | NSD1          |
| rs11789139 | c | g | 0.8258 | -0.031 | 0.006 | 1.38E-07 | 2.44E-04 | chr9  | 136185324 |               | LCN1P2        | SURF6         |
| rs500499   | c | g | 0.5378 | 0.0232 | 0.004 | 1.44E-07 | 1.57E-03 | chr9  | 136148648 | ABO           |               |               |
| rs12238108 | t | c | 0.2083 | 0.0275 | 0.005 | 1.46E-07 | 6.86E-08 | chr9  | 71221469  | RP11-274B18.4 |               |               |
| rs72813185 | a | c | 0.2363 | -0.027 | 0.005 | 1.48E-07 | 1.07E-07 | chr5  | 176739110 | MXD3          |               |               |
| rs2252317  | t | g | 0.8582 | 0.0414 | 0.008 | 1.54E-07 | 1.37E-07 | chr5  | 176837490 | GRK6          |               |               |
| rs633862   | t | c | 0.5512 | 0.0227 | 0.004 | 1.54E-07 | 1.49E-03 | chr9  | 136155444 |               | ABO           | Y_RNA         |
| rs244731   | a | g | 0.2435 | -0.026 | 0.005 | 1.63E-07 | 1.00E-07 | chr5  | 176539679 |               | FGFR4         | NSD1          |
| rs6123359  | a | g | 0.9037 | -0.041 | 0.008 | 1.79E-07 | 3.96E-08 | chr20 | 52714706  |               | BCAS1         | CYP24A1       |
| rs10869099 | t | c | 0.7915 | -0.027 | 0.005 | 1.83E-07 | 8.67E-08 | chr9  | 71220831  | RP11-274B18.4 |               |               |
| rs244728   | t | c | 0.2347 | -0.027 | 0.005 | 2.17E-07 | 1.36E-07 | chr5  | 176537407 |               | FGFR4         | NSD1          |
| rs4637914  | a | t | 0.2091 | 0.0269 | 0.005 | 2.49E-07 | 1.20E-07 | chr9  | 71222223  | RP11-274B18.4 |               |               |
| rs244729   | c | g | 0.755  | 0.0254 | 0.005 | 2.66E-07 | 1.72E-07 | chr5  | 176539018 |               | FGFR4         | NSD1          |
| rs67008484 | t | c | 0.7613 | 0.0255 | 0.005 | 3.61E-07 | 2.60E-07 | chr5  | 176735383 | MXD3          |               |               |
| rs7205649  | t | c | 0.1428 | 0.0303 | 0.006 | 3.80E-07 | 1.23E-04 | chr16 | 79939504  |               | RP11-345M22.3 | RP11-148M9.1  |
| rs3105419  | c | g | 0.2403 | -0.025 | 0.005 | 3.98E-07 | 2.56E-07 | chr5  | 176551396 |               | FGFR4         | NSD1          |
| rs28579821 | t | c | 0.2808 | 0.0325 | 0.006 | 4.22E-07 | 3.66E-07 | chr7  | 155287014 | CNPY1         |               |               |
| rs8176690  | a | g | 0.5862 | 0.022  | 0.004 | 4.48E-07 | 9.59E-05 | chr9  | 136138317 | ABO           |               |               |
| rs75719543 | t | c | 0.9688 | 0.0809 | 0.016 | 4.64E-07 | 3.85E-07 | chr12 | 85953371  |               | RP11-408B11.2 | RP11-629O19.1 |
| rs244727   | t | c | 0.2378 | -0.026 | 0.005 | 4.71E-07 | 2.98E-07 | chr5  | 176536549 |               | FGFR4         | NSD1          |
| rs12235842 | t | c | 0.2008 | 0.0271 | 0.005 | 4.86E-07 | 2.40E-07 | chr9  | 71232678  | RP11-274B18.4 |               |               |
| rs7724098  | a | g | 0.7594 | 0.0248 | 0.005 | 4.87E-07 | 3.77E-07 | chr5  | 176659570 | NSD1          |               |               |
| rs9313752  | a | c | 0.7595 | 0.0248 | 0.005 | 4.95E-07 | 3.77E-07 | chr5  | 176645435 | NSD1          |               |               |
| rs13331920 | c | g | 0.8582 | -0.03  | 0.006 | 5.02E-07 | 4.21E-05 | chr16 | 79935590  |               | RP11-345M22.3 | RP11-148M9.1  |
| rs7193332  | a | g | 0.8595 | -0.03  | 0.006 | 5.19E-07 | 3.75E-05 | chr16 | 79936215  |               | RP11-345M22.3 | RP11-148M9.1  |
| rs2073828  | a | g | 0.4132 | -0.022 | 0.004 | 5.26E-07 | 6.44E-05 | chr9  | 136137140 | ABO           |               |               |

|            |   |   |        |        |       |          |          |       |           |               |               |              |
|------------|---|---|--------|--------|-------|----------|----------|-------|-----------|---------------|---------------|--------------|
| rs8176681  | t | c | 0.5859 | 0.0218 | 0.004 | 5.44E-07 | 6.69E-05 | chr9  | 136139754 | ABO           |               |              |
| rs2073827  | c | g | 0.4132 | -0.022 | 0.004 | 5.45E-07 | 5.86E-05 | chr9  | 136137133 | ABO           |               |              |
| rs918459   | a | g | 0.7594 | 0.0247 | 0.005 | 5.50E-07 | 4.34E-07 | chr5  | 176669030 | NSD1          |               |              |
| rs11244061 | t | c | 0.1172 | 0.0322 | 0.006 | 5.68E-07 | 3.52E-04 | chr9  | 136153981 |               | ABO           | Y_RNA        |
| rs35929305 | t | c | 0.2187 | 0.0293 | 0.006 | 6.03E-07 | 6.22E-07 | chr1  | 35092426  |               | RP4-657M3.2   | MIR552       |
| rs2073826  | t | g | 0.413  | -0.022 | 0.004 | 6.17E-07 | 5.68E-05 | chr9  | 136136963 | ABO           |               |              |
| rs244707   | a | t | 0.7623 | 0.025  | 0.005 | 6.27E-07 | 4.41E-07 | chr5  | 176555636 |               | FGFR4         | NSD1         |
| rs887258   | c | g | 0.2195 | 0.0257 | 0.005 | 6.43E-07 | 2.46E-05 | chr17 | 59479580  | TBX2          |               |              |
| rs1476781  | t | c | 0.2203 | 0.0257 | 0.005 | 6.53E-07 | 7.81E-05 | chr17 | 59476415  | RP11-332H18.5 |               |              |
| rs7721671  | t | c | 0.24   | -0.025 | 0.005 | 6.54E-07 | 4.96E-07 | chr5  | 176630984 | NSD1          |               |              |
| rs2109019  | a | c | 0.2201 | 0.0256 | 0.005 | 6.75E-07 | 1.61E-07 | chr17 | 59475888  | RP11-332H18.5 |               |              |
| rs6561600  | a | g | 0.7392 | -0.024 | 0.005 | 6.90E-07 | 1.58E-06 | chr13 | 33431045  |               | PDS5B         | LINC00423    |
| rs244726   | a | g | 0.2507 | -0.025 | 0.005 | 7.04E-07 | 4.56E-07 | chr5  | 176536408 |               | FGFR4         | NSD1         |
| rs11648875 | t | c | 0.1415 | 0.0296 | 0.006 | 7.13E-07 | 2.45E-05 | chr16 | 79939049  |               | RP11-345M22.3 | RP11-148M9.1 |
| rs4976685  | a | g | 0.6681 | 0.0221 | 0.005 | 7.21E-07 | 5.56E-07 | chr5  | 176766177 | LMAN2         |               |              |
| rs6872952  | a | g | 0.2561 | -0.025 | 0.005 | 7.35E-07 | 5.34E-07 | chr5  | 176650489 | NSD1          |               |              |
| rs12652509 | a | g | 0.24   | -0.025 | 0.005 | 7.50E-07 | 5.70E-07 | chr5  | 176626441 | NSD1          |               |              |
| rs10037110 | a | t | 0.2431 | -0.024 | 0.005 | 7.67E-07 | 5.72E-07 | chr5  | 176658066 | NSD1          |               |              |
| rs78463612 | c | g | 0.9261 | 0.0422 | 0.009 | 8.09E-07 | 7.46E-07 | chr6  | 100284585 |               | Y_RNA         | MCHR2        |
| rs4976677  | a | g | 0.7599 | 0.0244 | 0.005 | 8.09E-07 | 6.14E-07 | chr5  | 176629546 | NSD1          |               |              |
| rs4325578  | a | g | 0.8561 | -0.029 | 0.006 | 9.06E-07 | 3.11E-06 | chr16 | 79936589  |               | RP11-345M22.3 | RP11-148M9.1 |
| rs60715095 | c | g | 0.8574 | -0.029 | 0.006 | 9.07E-07 | 5.73E-05 | chr16 | 79935768  |               | RP11-345M22.3 | RP11-148M9.1 |
| rs28580467 | c | g | 0.8577 | -0.029 | 0.006 | 9.26E-07 | 4.11E-05 | chr16 | 79934279  |               | RP11-345M22.3 | RP11-148M9.1 |
| rs59520813 | a | g | 0.143  | 0.0292 | 0.006 | 9.45E-07 | 9.70E-05 | chr16 | 79936068  |               | RP11-345M22.3 | RP11-148M9.1 |
| rs60280876 | c | g | 0.1427 | 0.0292 | 0.006 | 9.61E-07 | 6.39E-05 | chr16 | 79935778  |               | RP11-345M22.3 | RP11-148M9.1 |
| rs647800   | a | g | 0.4203 | -0.021 | 0.004 | 9.64E-07 | 2.72E-03 | chr9  | 136148000 | ABO           |               |              |
| rs6556307  | a | g | 0.2404 | -0.024 | 0.005 | 9.68E-07 | 7.49E-07 | chr5  | 176641434 | NSD1          |               |              |
| rs6872021  | a | g | 0.7575 | 0.0242 | 0.005 | 1.05E-06 | 6.24E-07 | chr5  | 176610012 | NSD1          |               |              |
| rs11740250 | c | g | 0.2399 | -0.024 | 0.005 | 1.07E-06 | 8.28E-07 | chr5  | 176721272 | NSD1          |               |              |
| rs78097283 | a | t | 0.9261 | 0.0414 | 0.009 | 1.11E-06 | 1.02E-06 | chr6  | 100280629 |               | Y_RNA         | MCHR2        |

|             |   |   |        |        |       |          |          |       |           |               |               |              |
|-------------|---|---|--------|--------|-------|----------|----------|-------|-----------|---------------|---------------|--------------|
| rs79480825  | a | t | 0.9261 | 0.0414 | 0.009 | 1.11E-06 | 1.02E-06 | chr6  | 100280611 |               | Y_RNA         | MCHR2        |
| rs9907379   | t | c | 0.2205 | 0.025  | 0.005 | 1.12E-06 | 8.99E-08 | chr17 | 59489893  | C17orf82      |               |              |
| rs12479682  | t | c | 0.1118 | 0.0329 | 0.007 | 1.13E-06 | 5.00E-07 | chr20 | 52738937  |               | BCAS1         | CYP24A1      |
| rs2762937   | a | g | 0.8091 | 0.028  | 0.006 | 1.15E-06 | 2.24E-07 | chr20 | 52778025  | CYP24A1       |               |              |
| rs1570669   | a | g | 0.6581 | -0.022 | 0.004 | 1.15E-06 | 4.74E-05 | chr20 | 52774427  | CYP24A1       |               |              |
| rs7197544   | t | g | 0.1433 | 0.0289 | 0.006 | 1.16E-06 | 1.41E-04 | chr16 | 79937201  |               | RP11-345M22.3 | RP11-148M9.1 |
| rs12480880  | t | c | 0.8886 | -0.033 | 0.007 | 1.19E-06 | 5.41E-07 | chr20 | 52738743  |               | BCAS1         | CYP24A1      |
| rs7203258   | a | g | 0.143  | 0.0289 | 0.006 | 1.25E-06 | 1.18E-06 | chr16 | 79937727  |               | RP11-345M22.3 | RP11-148M9.1 |
| rs7204126   | t | c | 0.143  | 0.0288 | 0.006 | 1.29E-06 | 5.55E-05 | chr16 | 79937504  |               | RP11-345M22.3 | RP11-148M9.1 |
| rs74038093  | a | t | 0.1435 | 0.0293 | 0.006 | 1.30E-06 | 1.79E-03 | chr16 | 79921081  |               | RP11-345M22.3 | RP11-148M9.1 |
| rs2762934   | a | g | 0.1831 | -0.027 | 0.006 | 1.33E-06 | 5.55E-08 | chr20 | 52771261  | CYP24A1       |               |              |
| rs115325566 | t | c | 0.0788 | -0.047 | 0.01  | 1.67E-06 | 2.85E-04 | chr5  | 176807191 | SLC34A1       |               |              |
| rs13295207  | a | c | 0.3538 | 0.0221 | 0.005 | 1.96E-06 | 4.78E-04 | chr9  | 136075679 |               | GBGT1         | OBP2B        |
| rs887461    | a | t | 0.7244 | -0.023 | 0.005 | 2.19E-06 | 1.45E-06 | chr7  | 90493764  | CDK14         |               |              |
| rs41340944  | a | g | 0.0861 | 0.0369 | 0.008 | 2.22E-06 | 8.74E-07 | chr10 | 70002020  | RP11-153K11.3 |               |              |
| rs751088    | a | t | 0.1935 | -0.027 | 0.006 | 2.25E-06 | 3.79E-07 | chr20 | 52776892  | CYP24A1       |               |              |
| rs10869158  | a | g | 0.7554 | -0.024 | 0.005 | 2.37E-06 | 1.15E-04 | chr9  | 71240051  | RP11-274B18.4 |               |              |
| rs11795370  | t | g | 0.2777 | 0.0249 | 0.005 | 2.38E-06 | 5.83E-07 | chr9  | 136059193 |               | GBGT1         | OBP2B        |
| rs8176668   | a | t | 0.6072 | 0.0208 | 0.004 | 2.38E-06 | 1.85E-05 | chr9  | 136144059 | ABO           |               |              |
| rs58323452  | a | g | 0.8196 | -0.026 | 0.006 | 2.40E-06 | 1.26E-03 | chr16 | 79928440  |               | RP11-345M22.3 | RP11-148M9.1 |
| rs10823164  | t | c | 0.9139 | -0.037 | 0.008 | 2.44E-06 | 9.94E-07 | chr10 | 70002705  |               | RP11-153K11.3 | KRT19P4      |
| rs8068318   | t | c | 0.7221 | -0.022 | 0.005 | 2.51E-06 | 2.08E-04 | chr17 | 59483766  | TBX2          |               |              |
| rs576123    | t | c | 0.6536 | -0.054 | 0.012 | 2.52E-06 | 2.17E-06 | chr9  | 136144308 | ABO           |               |              |
| rs933992    | t | c | 0.1535 | 0.0268 | 0.006 | 2.58E-06 | 2.56E-06 | chr3  | 69764203  |               | RP11-444P10.1 | MITF         |
| rs62071306  | a | c | 0.344  | 0.0231 | 0.005 | 2.62E-06 | 5.98E-05 | chr17 | 59476066  | RP11-332H18.5 |               |              |
| rs10998033  | a | g | 0.914  | -0.037 | 0.008 | 2.64E-06 | 1.04E-06 | chr10 | 70002749  |               | RP11-153K11.3 | KRT19P4      |
| rs7358139   | t | c | 0.0861 | 0.0367 | 0.008 | 2.65E-06 | 1.08E-06 | chr10 | 70002260  |               | RP11-153K11.3 | KRT19P4      |
| rs7036642   | a | g | 0.3931 | -0.021 | 0.004 | 2.66E-06 | 1.01E-05 | chr9  | 136144626 | ABO           |               |              |
| rs9783267   | c | g | 0.0861 | 0.0367 | 0.008 | 2.69E-06 | 1.07E-06 | chr10 | 70002494  |               | RP11-153K11.3 | KRT19P4      |
| rs73271107  | a | g | 0.9138 | -0.037 | 0.008 | 2.70E-06 | 1.08E-06 | chr10 | 70002971  |               | RP11-153K11.3 | KRT19P4      |

|            |   |   |        |        |       |          |          |       |           |               |               |              |
|------------|---|---|--------|--------|-------|----------|----------|-------|-----------|---------------|---------------|--------------|
| rs12494375 | c | g | 0.8465 | -0.027 | 0.006 | 2.71E-06 | 2.69E-06 | chr3  | 69765396  |               | RP11-444P10.1 | MITF         |
| rs7046674  | t | c | 0.3928 | -0.021 | 0.004 | 2.74E-06 | 2.29E-05 | chr9  | 136147012 | ABO           |               |              |
| rs8176686  | t | c | 0.5869 | 0.0209 | 0.005 | 2.76E-06 | NA       | chr9  | 136138776 | ABO           |               |              |
| rs12952625 | a | g | 0.7213 | -0.022 | 0.005 | 2.91E-06 | 1.52E-05 | chr17 | 59478644  | TBX2          |               |              |
| rs3802030  | t | g | 0.2798 | 0.0223 | 0.005 | 2.93E-06 | 1.96E-06 | chr7  | 90484578  | CDK14         |               |              |
| rs4855446  | a | g | 0.1537 | 0.0266 | 0.006 | 3.13E-06 | 5.68E-06 | chr3  | 69768996  |               | RP11-444P10.1 | MITF         |
| rs8074151  | a | g | 0.7238 | -0.022 | 0.005 | 3.15E-06 | 1.26E-03 | chr17 | 59485017  | TBX2          |               |              |
| rs8078036  | a | g | 0.7238 | -0.022 | 0.005 | 3.18E-06 | 1.25E-03 | chr17 | 59485120  | TBX2          |               |              |
| rs10869160 | a | g | 0.2428 | 0.0232 | 0.005 | 3.18E-06 | 2.18E-05 | chr9  | 71241343  | RP11-274B18.4 |               |              |
| rs10781095 | a | g | 0.7571 | -0.023 | 0.005 | 3.23E-06 | 1.85E-04 | chr9  | 71240969  | RP11-274B18.4 |               |              |
| rs1057987  | t | c | 0.7237 | -0.022 | 0.005 | 3.28E-06 | 1.19E-03 | chr17 | 59485555  | TBX2          |               |              |
| rs6767501  | t | c | 0.1537 | 0.0266 | 0.006 | 3.33E-06 | 3.30E-06 | chr3  | 69770411  |               | RP11-444P10.1 | MITF         |
| rs34446110 | c | g | 0.7219 | -0.022 | 0.005 | 3.35E-06 | 1.51E-03 | chr17 | 59478354  | TBX2          |               |              |
| rs1000423  | t | c | 0.7219 | -0.022 | 0.005 | 3.36E-06 | 1.90E-03 | chr17 | 59475642  | RP11-332H18.5 |               |              |
| rs4855322  | a | t | 0.1536 | 0.0265 | 0.006 | 3.41E-06 | 3.38E-06 | chr3  | 69769363  |               | RP11-444P10.1 | MITF         |
| rs2240736  | t | c | 0.7254 | -0.022 | 0.005 | 3.41E-06 | 1.56E-03 | chr17 | 59485393  | TBX2          |               |              |
| rs2270114  | c | g | 0.7095 | -0.022 | 0.005 | 3.42E-06 | 1.12E-03 | chr17 | 59478776  | TBX2          |               |              |
| rs11794634 | t | c | 0.6613 | -0.023 | 0.005 | 3.43E-06 | 1.22E-03 | chr9  | 136090813 |               | OBP2B         | LCN1P1       |
| rs8176649  | a | g | 0.3927 | -0.02  | 0.004 | 3.45E-06 | 2.68E-05 | chr9  | 136147295 | ABO           |               |              |
| rs75973613 | a | t | 0.9863 | 0.1088 | 0.023 | 3.46E-06 | 5.25E-07 | chr13 | 46364453  | SIAH3         |               |              |
| rs7625281  | t | c | 0.1536 | 0.0265 | 0.006 | 3.47E-06 | 3.45E-06 | chr3  | 69768940  |               | RP11-444P10.1 | MITF         |
| rs4855443  | a | g | 0.8463 | -0.026 | 0.006 | 3.54E-06 | 3.56E-06 | chr3  | 69766382  |               | RP11-444P10.1 | MITF         |
| rs4855445  | t | c | 0.154  | 0.0264 | 0.006 | 3.55E-06 | 3.57E-06 | chr3  | 69766596  |               | RP11-444P10.1 | MITF         |
| rs2289804  | a | g | 0.9286 | -0.04  | 0.009 | 3.55E-06 | 2.18E-06 | chr10 | 69993032  | RP11-153K11.3 |               |              |
| rs8176682  | t | c | 0.3924 | -0.02  | 0.004 | 3.56E-06 | 1.88E-06 | chr9  | 136139297 | ABO           |               |              |
| rs8073698  | t | c | 0.7238 | -0.022 | 0.005 | 3.60E-06 | 1.29E-03 | chr17 | 59484833  | TBX2          |               |              |
| rs4078174  | a | g | 0.8245 | -0.026 | 0.006 | 3.63E-06 | 5.66E-04 | chr16 | 79932322  |               | RP11-345M22.3 | RP11-148M9.1 |
| rs7873635  | t | c | 0.3915 | -0.021 | 0.004 | 3.74E-06 | 9.77E-06 | chr9  | 136132012 | ABO           |               |              |
| rs11697119 | a | g | 0.3207 | -0.022 | 0.005 | 3.83E-06 | 1.64E-06 | chr20 | 52739292  |               | BCAS1         | CYP24A1      |
| rs7215775  | a | g | 0.2745 | 0.022  | 0.005 | 3.93E-06 | 1.67E-03 | chr17 | 59484316  | TBX2          |               |              |

|            |   |   |        |        |       |          |          |       |           |               |               |               |
|------------|---|---|--------|--------|-------|----------|----------|-------|-----------|---------------|---------------|---------------|
| rs12376362 | a | c | 0.8057 | -0.025 | 0.005 | 3.95E-06 | 8.75E-07 | chr9  | 71172306  | RP11-274B18.4 |               |               |
| rs17597865 | t | c | 0.0517 | -0.051 | 0.011 | 3.98E-06 | 3.18E-06 | chr15 | 39030873  |               | C15orf53      | RP11-326N17.1 |
| rs8176691  | t | c | 0.3919 | -0.02  | 0.004 | 4.04E-06 | 1.28E-05 | chr9  | 136138229 | ABO           |               |               |
| rs8176702  | a | g | 0.3915 | -0.02  | 0.004 | 4.06E-06 | 1.30E-05 | chr9  | 136136146 | ABO           |               |               |
| rs4962040  | a | g | 0.6081 | 0.0203 | 0.004 | 4.08E-06 | 1.76E-05 | chr9  | 136133531 | ABO           |               |               |
| rs10781092 | a | g | 0.2915 | 0.0221 | 0.005 | 4.10E-06 | 1.55E-05 | chr9  | 71239648  | RP11-274B18.4 |               |               |
| rs11791611 | a | g | 0.3509 | 0.0215 | 0.005 | 4.15E-06 | 9.84E-04 | chr9  | 136077441 |               | GBGT1         | OBP2B         |
| rs1411992  | c | g | 0.8074 | -0.025 | 0.005 | 4.17E-06 | 7.50E-07 | chr9  | 71170702  | RP11-274B18.4 |               |               |
| rs4855444  | t | c | 0.8407 | -0.026 | 0.006 | 4.43E-06 | 4.56E-06 | chr3  | 69766592  |               | RP11-444P10.1 | MITF          |
| rs1980513  | t | g | 0.0769 | 0.0366 | 0.008 | 4.55E-06 | 5.26E-05 | chr14 | 35581151  | FAM177A1      |               |               |
| rs9891115  | a | g | 0.6476 | -0.023 | 0.005 | 4.60E-06 | 2.41E-04 | chr17 | 59482173  | TBX2          |               |               |
| rs13330024 | a | t | 0.856  | -0.027 | 0.006 | 4.68E-06 | 1.42E-03 | chr16 | 79907901  |               | RP11-345M22.3 | RP11-148M9.1  |
| rs7616567  | a | g | 0.1539 | 0.0261 | 0.006 | 4.70E-06 | 4.72E-06 | chr3  | 69766794  |               | RP11-444P10.1 | MITF          |
| rs62252967 | t | c | 0.121  | 0.0285 | 0.006 | 4.83E-06 | 5.90E-06 | chr3  | 69718556  |               | RP11-444P10.1 | MITF          |
| rs10869153 | a | c | 0.7663 | -0.023 | 0.005 | 4.87E-06 | 1.38E-04 | chr9  | 71239400  | RP11-274B18.4 |               |               |
| rs729781   | a | g | 0.276  | 0.0218 | 0.005 | 4.92E-06 | 1.52E-03 | chr17 | 59486799  | TBX2          |               |               |
| rs558599   | a | c | 0.4145 | 0.0238 | 0.005 | 4.94E-06 | 9.28E-04 | chr9  | 136192551 |               | LCN1P2        | SURF6         |

P.value.FE: SNP P-value from fixed-effects model

P.value.RE: SNP P-value from random-effects mode



**Supplementary Table 3. Associations of top single nucleotide polymorphisms with ln-transformed intact FGF23 concentration (exclusion of CHS and OPRA GWAS from meta-analysis)**

| SNP        | Nearest gene <sup>‡</sup> | Chr | Position  | FGF23 Increasing Allele | Other Allele | FGF23 Increasing Allele Frequency <sup>‡</sup> | Model 1                 |                         | Model 2 <sup>†</sup> |                         |
|------------|---------------------------|-----|-----------|-------------------------|--------------|------------------------------------------------|-------------------------|-------------------------|----------------------|-------------------------|
|            |                           |     |           |                         |              |                                                | (N=13,670)              |                         | (N=12,519)           |                         |
|            |                           |     |           |                         |              |                                                | $\beta^{\ddagger}$ (SE) | p-value                 | $\beta$ (SE)         | p-value                 |
| rs17216707 | <i>CYP24A1</i>            | 20  | 52732362  | T                       | C            | 0.80                                           | 0.057<br>(0.006)        | 1.0 x 10 <sup>-25</sup> | 0.054<br>(0.005)     | 1.5 x 10 <sup>-23</sup> |
| rs2769071  | <i>ABO</i>                | 9   | 136145974 | G                       | A            | 0.37                                           | 0.037<br>(0.005)        | 7.1 x 10 <sup>-16</sup> | 0.032<br>(0.008)     | 1.3 x 10 <sup>-4</sup>  |
| rs11741640 | <i>RGS14</i>              | 5   | 176792743 | G                       | A            | 0.73                                           | 0.038<br>(0.005)        | 1.6 x 10 <sup>-14</sup> | 0.037<br>(0.005)     | 3.6 x 10 <sup>-14</sup> |
| rs17479566 | <i>LINC01506</i>          | 9   | 71198013  | T                       | C            | 0.22                                           | 0.032<br>(0.005)        | 3.8 x 10 <sup>-9</sup>  | 0.044<br>(0.009)     | 3.8 x 10 <sup>-6</sup>  |
| rs9925837  | <i>LINC01229</i>          | 16  | 79927303  | G                       | A            | 0.13                                           | 0.032<br>(0.006)        | 2.2 x 10 <sup>-7</sup>  | 0.032<br>(0.006)     | 1.0 x 10 <sup>-7</sup>  |

*Chr* = chromosome

*Only top SNP from each region shown.*

*Model 1 includes age, sex and first 10 principal components of ancestry*

*Model 2 additionally adjusts for BMI, eGFR and eGFR-squared.*

<sup>†</sup>*Results for Model 2 were not available for the Indiana Sisters Study*

<sup>‡</sup>*Minor allele frequency data from 1000 Genome Phase 1 genotype data*

<sup>‡</sup>*Beta-estimates are interpreted as the relative difference in FGF23 concentration per minor allele, e.g. 0.055 is a 5.5% higher FGF23 concentration per additional allele*

**Supplementary Table 4. Genetically predicted gene expression results from GWAS summary statistics**

| Tissue                       | Gene     | Chr | Z -score | P value  | Variance | R <sup>2</sup> | N SNPs | Model N |
|------------------------------|----------|-----|----------|----------|----------|----------------|--------|---------|
| Skeletal Muscle              | RGS14*   | 5   | 7.956    | 1.78E-15 | 0.104    | 0.166          | 26     | 36      |
| Subcutaneous Adipose         | RGS14*   | 5   | 7.017    | 2.26E-12 | 0.079    | 0.178          | 4      | 4       |
| Heart: Atrial Appendage      | RGS14*   | 5   | 7.005    | 2.47E-12 | 0.18     | 0.305          | 14     | 14      |
| Aortic Artery                | RGS14*   | 5   | 6.887    | 5.70E-12 | 0.279    | 0.378          | 30     | 31      |
| Transformed Fibroblast Cells | RGS14*   | 5   | 6.748    | 1.50E-11 | 0.418    | 0.568          | 22     | 23      |
| Heart: Left Ventricle        | RGS14*   | 5   | 6.219    | 5.00E-10 | 0.192    | 0.313          | 22     | 23      |
| Coronary Artery              | RGS14*   | 5   | 4.649    | 3.34E-06 | 0.149    | 0.21           | 27     | 29      |
| Subcutaneous Adipose         | TBX2*    | 17  | 4.581    | 4.62E-06 | 0.046    | 0.024          | 32     | 34      |
| Subcutaneous Adipose         | HDDC2    | 6   | 4.527    | 5.97E-06 | 0.135    | 0.125          | 46     | 50      |
| Skeletal Muscle              | NSD1*    | 5   | -4.33    | 1.50E-05 | 0.012    | 0.035          | 6      | 6       |
| Skeletal Muscle              | TBX2*    | 17  | 4.043    | 5.27E-05 | 0.008    | 0.031          | 6      | 6       |
| Skeletal Muscle              | EIF3F    | 11  | -4.04    | 5.28E-05 | 0.078    | 0.145          | 23     | 24      |
| Subcutaneous Adipose         | ARHGAP29 | 1   | 3.981    | 6.86E-05 | 0.048    | 0.05           | 40     | 42      |
| Subcutaneous Adipose         | EIF3F    | 11  | -3.96    | 7.40E-05 | 0.084    | 0.164          | 17     | 18      |
| Subcutaneous Adipose         | JPH2     | 20  | -3.93    | 8.36E-05 | 0.036    | 0.023          | 33     | 38      |
| Aortic Artery                | SNX7     | 1   | -3.91    | 9.16E-05 | 0.082    | 0.168          | 14     | 14      |
| Skeletal Muscle              | MXD3*    | 5   | 3.908    | 9.30E-05 | 0.065    | 0.095          | 40     | 41      |
| Transformed Fibroblast Cells | KCTD6    | 3   | -3.85    | 1.19E-04 | 0.027    | 0.01           | 20     | 20      |
| Heart: Atrial Appendage      | MXD3*    | 5   | 3.821    | 1.33E-04 | 0.062    | 0.148          | 15     | 15      |
| Skeletal Muscle              | RPL29    | 3   | 3.809    | 1.39E-04 | 0.232    | 0.322          | 33     | 47      |
| Skeletal Muscle              | ZNF404   | 19  | 3.789    | 1.51E-04 | 0.062    | 0.163          | 34     | 38      |
| Skeletal Muscle              | WARS2    | 1   | 3.756    | 1.73E-04 | 0.266    | 0.41           | 21     | 21      |
| Whole Blood Cells            | EIF3F    | 11  | -3.72    | 1.98E-04 | 0.093    | 0.149          | 25     | 25      |
| Transformed Fibroblast Cells | LTBP4    | 19  | 3.714    | 2.04E-04 | 0.081    | 0.091          | 39     | 40      |
| Transformed Fibroblast Cells | DOK5*    | 20  | -3.7     | 2.17E-04 | 0.002    | 0.007          | 9      | 9       |
| Spleen                       | REXO1    | 19  | -3.66    | 2.55E-04 | 0.078    | 0.049          | 26     | 26      |
| Subcutaneous Adipose         | WARS2    | 1   | 3.631    | 2.82E-04 | 0.347    | 0.497          | 18     | 19      |
| Skeletal Muscle              | PDLIM7*  | 5   | 3.63     | 2.83E-04 | 0.202    | 0.268          | 28     | 35      |
| Heart: Atrial Appendage      | KDM4A    | 1   | 3.626    | 2.87E-04 | 0.002    | 0.052          | 4      | 4       |
| Liver                        | SMYD2    | 1   | 3.616    | 2.99E-04 | 0.1      | 0.139          | 25     | 26      |
| Heart: Atrial Appendage      | PVRL2    | 19  | 3.6      | 3.18E-04 | 0.146    | 0.126          | 47     | 48      |
| Transformed Fibroblast Cells | ENO1     | 1   | -3.57    | 3.53E-04 | 0.008    | 0.02           | 14     | 15      |
| Transformed Fibroblast Cells | PPP2CB   | 8   | -3.56    | 3.65E-04 | 0.052    | 0.075          | 30     | 33      |
| Transformed Fibroblast Cells | FAM124A  | 13  | 3.533    | 4.11E-04 | 0.01     | 0.016          | 5      | 6       |
| Subcutaneous Adipose         | PYGL     | 14  | -3.53    | 4.12E-04 | 0.029    | 0.039          | 29     | 32      |
| Skeletal Muscle              | SVIP     | 11  | -3.53    | 4.12E-04 | 0.162    | 0.191          | 33     | 41      |
| Subcutaneous Adipose         | BTBD19   | 1   | 3.532    | 4.13E-04 | 0.005    | 0.028          | 10     | 13      |
| Skeletal Muscle              | CCNDBP1  | 15  | 3.496    | 4.73E-04 | 0.007    | 0.007          | 7      | 7       |

\*represents genes which localize to top GWAS signals (Table 2)

Performance prediction R<sup>2</sup>

Variance of the gene's predicted expression, calculated as  $W'x G x W$  (where W is the vector of SNP weights in a gene's model, W' is its transpose, and G is the covariance matrix)

Number of SNPs included in the prediction model for that gene available in the FGF23GWAS summary statistics

Number of SNPs used to construct the prediction model for the gene in the tissue of interest using the GTExdata
